1     **Pesticide-induced resurgence of the brown planthopper is mediated by**  
2     **diverse actors that promote juvenile hormone biosynthesis and female**  
3                                    **fecundity**

4     Yang Gao<sup>a\*</sup> , Shao-Cong Su<sup>a\*</sup>, Zhao-Yu Liu<sup>a</sup>, Dick R. Nässel<sup>b</sup>, Chris Bass<sup>c</sup>,  
5     Cong-Fen Gao<sup>a</sup>, Shun-Fan Wu<sup>a,\*</sup>

6     <sup>a</sup>     College of Plant Protection, Nanjing Agricultural University, Nanjing  
7     210095, China.

8     <sup>b</sup>     Department of Zoology, Stockholm University, Stockholm, Sweden

9     <sup>c</sup>     College of Life and Environmental Sciences, Biosciences, University of  
10     Exeter, Penryn Campus, Penryn, UK

11     \* These authors contributed equally to this work.

12     \*Corresponding author. E-mail address: [wusf@njau.edu.cn](mailto:wusf@njau.edu.cn) (S.-F. Wu)

13 **Abstract**

14 Pesticide-induced resurgence, increases in pest insect populations following  
15 pesticide application, is a serious threat to the sustainable control of many highly  
16 damaging crop pests. Resurgence can result from pesticide-enhanced pest  
17 reproduction, however, the molecular mechanisms mediating this process remain  
18 unresolved. Here we show that brown planthopper (BPH) resurgence following  
19 emamectin benzoate (EB) exposure results from the coordinated action of a diverse  
20 suite of actors that regulate juvenile hormone (JH) levels, resulting in increased JH  
21 titer in adult females and enhanced fecundity. Following reports of BPH resurgence in  
22 rice crops when this species is exposed to EB, we demonstrate that EB treatment  
23 results in profound changes in female BPH fitness including enhanced ovary  
24 development and elevated egg production. This enhanced reproductive fitness  
25 results from the EB-mediated upregulation of key genes involved in the regulation of  
26 JH, including *JHAMT*, *Met* and *Kr-h1* and the downregulation of allatostatin (*AstA*)  
27 and allatostatin receptor (*AstAR*) expression. The remodulation of gene expression  
28 following EB exposure is dependent on the action of this insecticide on its molecular  
29 target the glutamate-gated chloride channel (GluCl) receptor. Collectively, these  
30 results provide mechanistic insights into the regulation of negative pesticide-induced  
31 responses in insects and reveal the key actors involved in the JH-signaling pathway  
32 that underpin pesticide resurgence.

33

## 34 Introduction

35 Chemical pesticides remain the primary means of controlling many of the world's  
36 most damaging arthropod crop pests [1, 2]. However, pesticide applications can result  
37 in pest resurgence, increases in pest insect populations that exceed natural, untreated  
38 population sizes, following an initial reduction of the pest population [3-5]. Two  
39 mechanisms have been implicated in pest resurgence - the loss of beneficial insects  
40 including natural enemies and pesticide-enhanced pest reproduction [3]. In the case  
41 of the latter, several pesticides, such as the insecticides triazophos, deltamethrin and  
42 the fungicide jinggangmycin, have been reported to stimulate pest reproduction [6-8].  
43 Pesticide-enhanced pest reproduction has been linked to changes in physiology and  
44 biochemistry of pest organisms after exposure to pesticides [3, 4]. However, the  
45 molecular mechanisms underlying enhanced reproduction associated with pest  
46 resurgence remain poorly resolved.

47 The brown planthopper (BPH), *Nilaparvata lugens* (Stål), is a notorious pest of  
48 rice crops throughout Asia causing annual losses of ~300 million dollars across major  
49 rice producing countries [2, 3]. BPH inhibits the growth of rice plants by feeding, and  
50 also transmits highly damaging plant viruses including rice grassy stunt virus and rice  
51 ragged stunt virus [9]. Currently, chemical insecticides play an indispensable role in  
52 the control of BPH due to their efficiency, rapid effect, and low cost. However, due to  
53 the widespread and intensive use of chemical insecticides, BPH has developed  
54 resistance to the majority of compounds used for control [2, 10].

55 Emamectin benzoate (EB) and abamectin are avermectin pesticides, and act as

56 allosteric modulators of insect glutamate gated chloride channels (GluCl<sub>s</sub>), inhibiting  
57 muscle contractions that lead to the cessation of insect feeding and subsequent death  
58 [11]. These insecticides exhibit particularly strong activity against Lepidoptera such as  
59 the rice leaffolder, *Cnaphalocrocis medinalis* Guénee, an important foliage-feeding  
60 insect which attacks rice during the vegetative stage [12]. Both BPH and the rice  
61 leaffolder are migratory pests with overlapping migratory paths, however, their  
62 occurrence period in the field differs by approximately one month, with leaffolders  
63 appearing earlier than BPH. Therefore, the use of EB to control rice leaffolder has the  
64 potential to impact BPH arriving later, via exposure to sublethal concentrations of this  
65 compound. In this regard, we have observed that when farmers use EB and abamectin  
66 to control leaffolders on rice crops in China, BPH outbreaks frequently occur in the  
67 same field. While sublethal doses of certain pesticides have been shown to enhance  
68 fecundity in BPH, including the insecticides triazophos and deltamethrin [6, 7, 13, 14]  
69 and the fungicides carbendazim and jinggangmycin [8], whether avermectins trigger  
70 resurgence in BPH via insecticide-enhanced reproduction remains unclear.

71       Reproduction in insects is influenced by external factors such as light [15],  
72 temperature [16], humidity [17] and nutrition [18], and endogenous factors such as the  
73 juvenile hormone (JH) [19], ecdysone [20], insulin [21] and TOR [22] pathways [23, 24].  
74 Of these, JH, has been particularly implicated in insecticide-induced enhanced  
75 fecundity, with triazophos and deltamethrin treatments leading to increased circulating  
76 JH III titers in BPH females [3]. JH is synthesized and secreted by the corpora allata  
77 in insects [25], and can promote reproduction by regulating the synthesis and secretion

78 of vitellogenin (vg) in the female fat body, and stimulating the absorption of vg by the  
79 developing oocyte [19]. However, the regulation of JH is complex [19] and the key  
80 actors involved in JH-mediated pesticide-enhanced reproduction remains an open  
81 question.

82 In this study, we used a diverse range of approaches to investigate the impact of  
83 sublethal doses of avermectins on BPH fecundity, and unravel the molecular  
84 mechanisms mediating enhanced reproduction following exposure to this insecticide  
85 class. We show that avermectin exposure results in profound changes in the  
86 expression of a key suite of genes that in combination regulate JH, resulting in  
87 increased JH titer in adult females, which promotes fecundity.

88

89 **RESULTS**

90 **GluCl allosteric modulators (emamectin benzoate and abamectin) stimulate**  
91 **fecundity of female *N. lugens***

92 To investigate whether GluCl modulators affect fecundity in BPH, we first  
93 determined the sub-lethal and median lethal doses of emamectin benzoate (EB) to  
94 4<sup>th</sup> instar nymphs, newly emerged males and females of BPH ([Table S1](#)). For this we  
95 employed two different bioassay methods, the rice seedling dip bioassay method and  
96 topical application bioassay method [[2](#), [26](#)], in order to assess both the systemic and  
97 contact toxicity of these insecticides ([Table S1](#)). We then systemically treated 4<sup>th</sup>  
98 instar nymphs of BPH with the estimated LC<sub>15</sub> and LC<sub>50</sub> concentrations of EB and  
99 examined the fecundity of BPH after these individuals mated with treated or  
100 untreated individuals. We use the term “t” to represent individuals treated with EB  
101 and “ck” to indicate control individuals that were treated with insecticide diluent minus  
102 insecticide. After treatment with the LC<sub>15</sub> and LC<sub>50</sub> concentrations of EB the number  
103 of eggs laid per female of BPH in ♀t × ♂t crosses increased by 1.48 and 1.40 times  
104 compared with control ♀ck × ♂ck crosses ([Figure 1A](#)); the number of eggs laid per  
105 female of BPH in ♀t × ♂ck crosses increased by 1.53 and 2.07 times compared with  
106 control crosses ([Figure 1B](#)); However, the number of eggs laid by per female of BPH  
107 in ♀ck × ♂t crosses did not increase significantly compared to control ♀ck × ♂ck  
108 crosses ([Figure 1C](#)).

**Table S1.** Determination of the toxicity of emamectin benzoate against BPH in systemic and topical application bioassays.

| Treatment method | Developmental stages  | Slope $\pm$ SE   | LC <sub>15</sub> (95%F.L.)                             | LC <sub>50</sub> (95%F.L.)                             | $\chi^2$ (df) | <i>P</i> value |
|------------------|-----------------------|------------------|--------------------------------------------------------|--------------------------------------------------------|---------------|----------------|
|                  |                       |                  | (mg/L) or LD <sub>15</sub><br>(95%F.L.)<br>(pg/insect) | (mg/L) or LD <sub>50</sub><br>(95%F.L.)<br>(pg/insect) |               |                |
| Systemic route   | 4 <sup>th</sup> nymph | 2.56 $\pm$ 0.487 | 0.87<br>(0.39-1.32)                                    | 2.21 (1.53-<br>2.82)                                   | 2.68 (4)      | 0.61           |
|                  | Male                  | 2.42 $\pm$ 0.35  | 0.80<br>(0.40-1.20)                                    | 2.13 (1.48-<br>2.78)                                   | 2.12 (4)      | 0.72           |
|                  | Female                | 2.47 $\pm$ 0.41  | 2.33<br>(1.09-3.56)                                    | 6.12 (4.18-<br>8.00)                                   | 3.56 (4)      | 0.50           |
| Contact route    | 4 <sup>th</sup> nymph | 2.52 $\pm$ 0.35  | 15.54 (9.46-<br>21.42)                                 | 39.90 (30.66-<br>49.56)                                | 2.60 (4)      | 0.63           |
|                  | Male                  | 2.77 $\pm$ 0.57  | 6.72<br>(2.52-10.92)                                   | 15.96<br>(9.66-21.84)                                  | 1.23 (3)      | 0.75           |

110

111

112

---

|        |                 |                        |                        |          |      |
|--------|-----------------|------------------------|------------------------|----------|------|
| Female | $3.31 \pm 0.76$ | 18.48 (6.72-<br>28.14) | 37.80<br>(23.10-50.40) | 0.79 (3) | 0.85 |
|--------|-----------------|------------------------|------------------------|----------|------|

---



113 Exposure of 4<sup>th</sup> instar nymphs with the LC<sub>15</sub> and LC<sub>50</sub> concentrations of EB in  
114 contact bioassays also significantly stimulated fecundity. After treatment with the LC<sub>15</sub>  
115 and LC<sub>50</sub> concentrations of EB, the number of eggs laid by per female of BPH in ♀t ×  
116 ♂t crosses increased by 1.18 and 1.26 times compared with the control (♀ck × ♂ck)  
117 (Figure 1D); The number of eggs laid per female of BPH in ♀t × ♂ck crosses  
118 increased by 1.27 and 1.56 times compared with the control crosses (Figure 1E);  
119 However, there was no significant difference in egg-laying number between ♀ck × ♂t  
120 crosses and controls (♀ck × ♂ck) (Figure 1F). These results reveal that EB can  
121 stimulate the fecundity of females following both the systemic and contact routes of  
122 exposure.

123 **Figure 1**

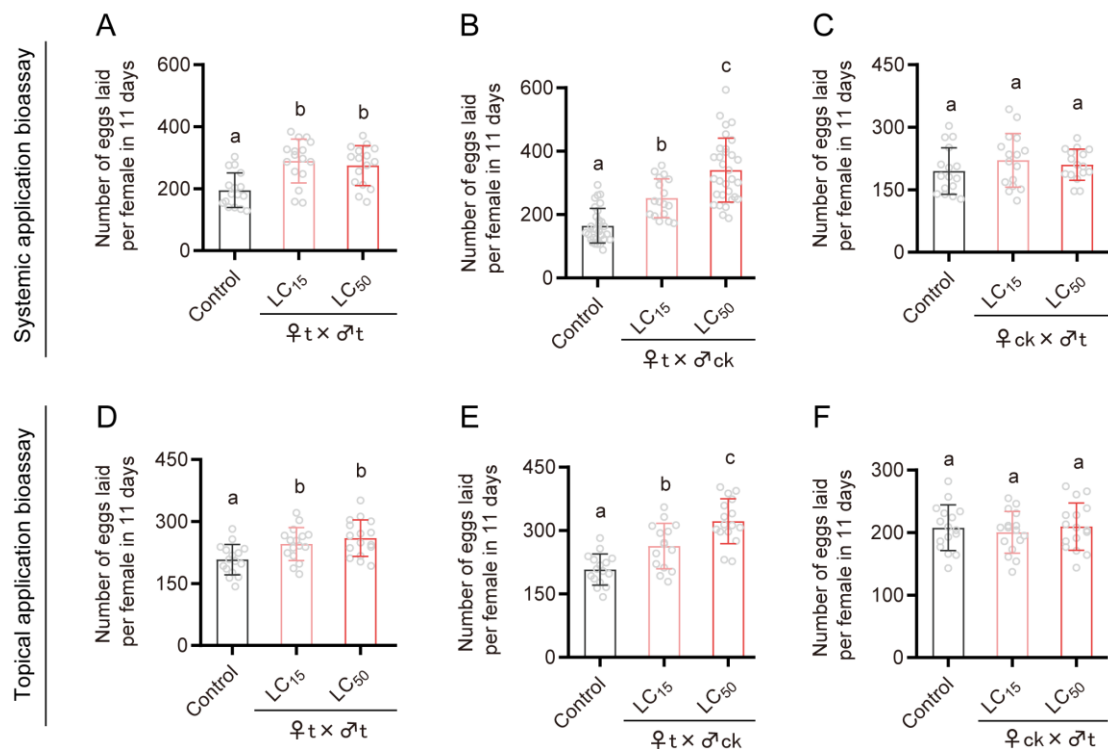

124  
125 **Figure 1.** Fecundity of BPH following exposure to sub-lethal (LC<sub>15</sub>) and median lethal (LC<sub>50</sub>)  
126 concentrations of emamectin benzoate following system application bioassays (A: ♀t × ♂t;  
127 B: ♀t × ♂ck; C: ♀ck × ♂t) and topical application bioassays (D: ♀t × ♂t; E: ♀t × ♂ck; F:

128 ♀ ck × ♂ t), respectively. The letter “t” represents treatment with insecticide, while “ck”  
129 indicates controls that was not treated with insecticide. All data are presented as the mean ±  
130 s.e.m. Different lower-case letters above the bars indicate significant differences (One-way  
131 ANOVA with Tukey’s Multiple Range Test,  $p < 0.05$ ).

132

133 We next examined whether EB treatment of adult BPH also stimulates  
134 reproduction. Indeed, treating newly emerged adults with the LC<sub>15</sub> and LC<sub>50</sub>  
135 concentrations of EB significantly stimulated the number of eggs laid per female  
136 (Figure 1-figure supplement 1A). Furthermore, sub-lethal exposure of 4<sup>th</sup> instar BPH  
137 nymphs to another GluCl allosteric modulator, abamectin (LC<sub>15</sub> and LC<sub>50</sub>  
138 concentrations) was also found to significantly enhance reproduction (Figure 1-figure  
139 supplement 1B).

140 **Figure 1-figure supplement 1**

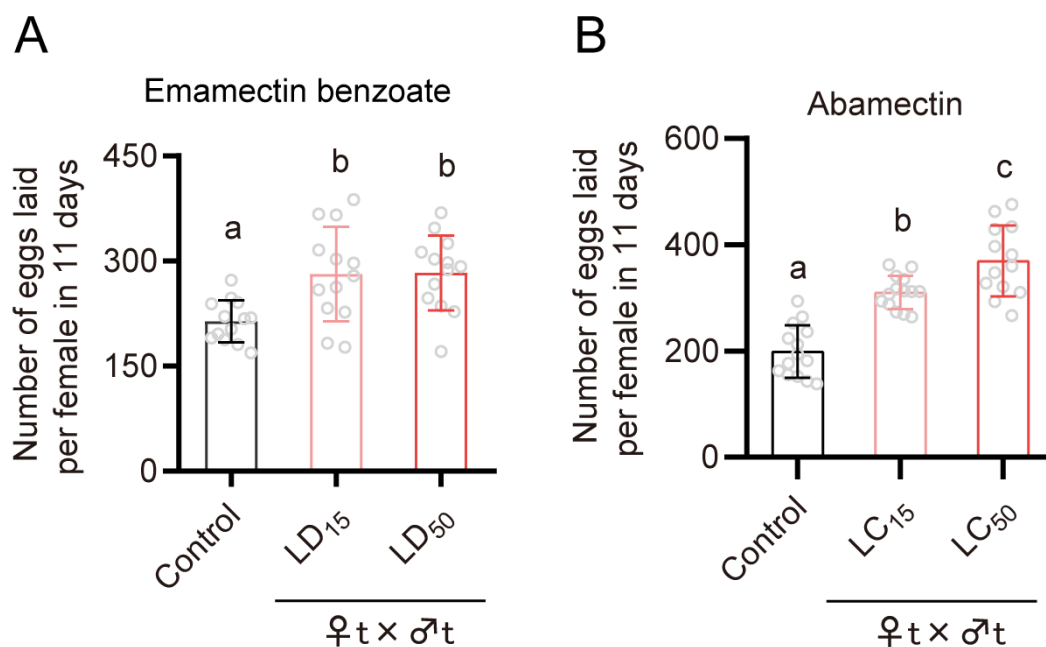

141

**Treatment on adult      Treatment on nymph**

142 **Figure 1-figure supplement 1.** (A) Fecundity of BPH when newly emerged adults were  
143 treated with sub-lethal (LD<sub>15</sub>) and median lethal (LD<sub>50</sub>) concentrations of emeactin benzoate

144 via topical application. (B) Fecundity of BPH when 4<sup>th</sup> instar nymphs were treated with sub-  
145 lethal (LC<sub>15</sub>) and median lethal (LC<sub>50</sub>) concentrations of abamectin via systemic exposure. All  
146 data are presented as the mean ± s.e.m. Different lower-case letters above the bars indicate  
147 significant differences (One-way ANOVA with Tukey's Multiple Range Test,  $p < 0.05$ ).

148 To examine if EB also stimulates egg-laying in other insect species we  
149 conducted bioassays on the small brown planthopper, *Laodelphax striatellus*, the  
150 white backed planthopper, *Sogatella furcifera* and fruit flies *Drosophila melanogaster*.  
151 In contrast to our findings on BPH, we found that sub-lethal doses (LC<sub>15</sub> and LC<sub>50</sub>) of  
152 EB inhibits fecundity of female *L. striatellus*, ([Figure1-figure supplement 2A-C](#)) and  
153 has no impact on the fecundity of *S. furcifera*, ([Figure1-figure supplement 2D-F](#)). In  
154 addition, we found that sublethal doses (LC<sub>15</sub> or LC<sub>50</sub>) of EB also inhibit fecundity in  
155 *D. melanogaster* ([Figure1-figure supplement 2G and H](#)). These results indicate that  
156 the stimulation of reproduction by EB in BPH is species-specific and does not extend  
157 to even related insect species.

158 **Figure 1-figure supplement 2**

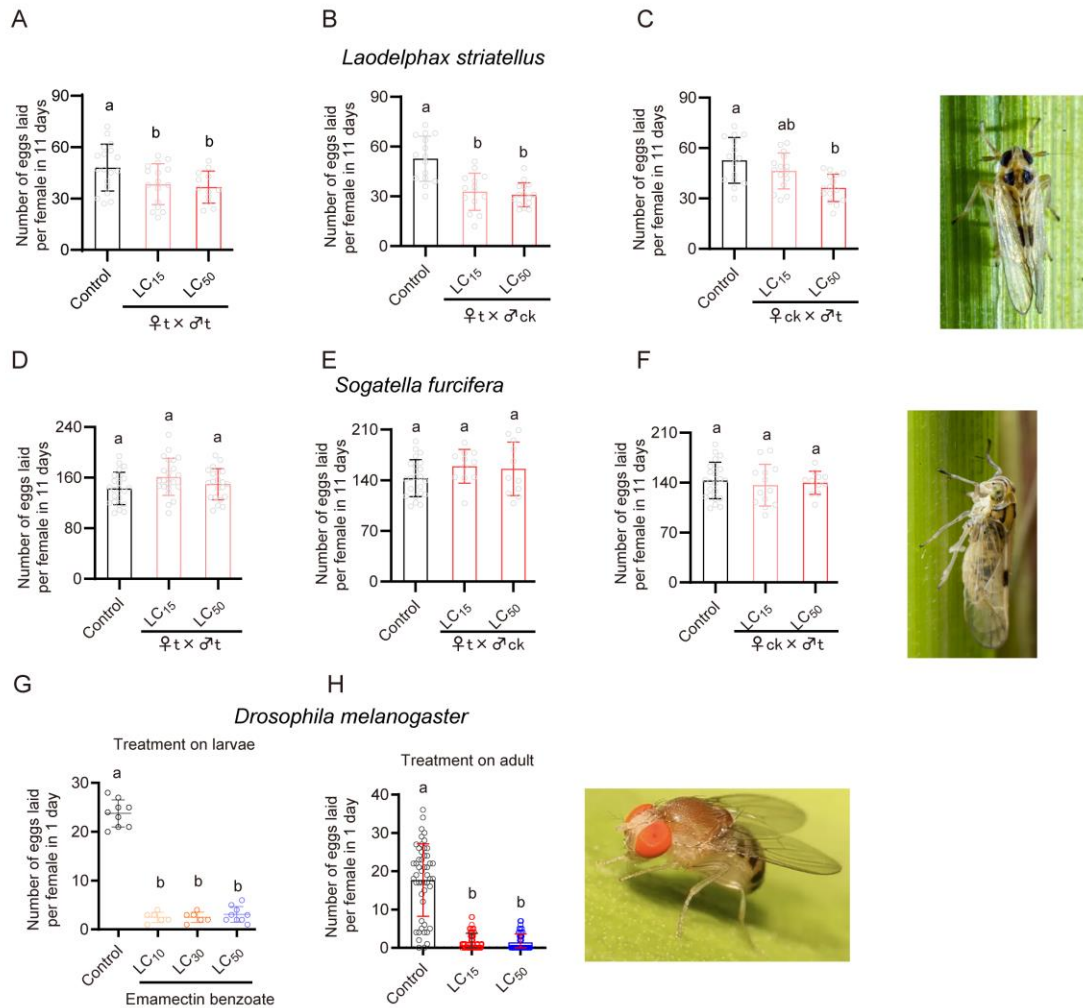

159

160 **Figure 1-figure supplement 2.** Fecundity of small brown planthopper, *Laodelphax striatellus*,

161 (A-C) white backed planthopper, *Sogatella furcifera* (D-F) and fruit fly, *Drosophila*

162 *melanogaster* (G and H) when larvae and newly emerged adults were treated with sub-lethal

163 concentrations of emamectin benzoate. All data are presented as the mean ± s.e.m. Different

164 lower-case letters above the bars indicate significant differences (One-way ANOVA with

165 Tukey's Multiple Range Test,  $p < 0.05$ ).

166

167 **The impact of EB treatment on BPH reproductive fitness**

168 To better understand the effects of EB on the reproductive fitness of BPH, the  
169 preoviposition period, emergence rate, female ratio, female longevity and female  
170 weight were evaluated following exposure using the systemic bioassay. The  
171 preoviposition period of females treated with the LC<sub>50</sub> of EB decreased significantly  
172 compared with the control ([Figure 1-figure supplement 3A](#)). In contrast no significant  
173 effects of EB on emergence rate and female ratio were observed ([Figure 1-figure  
174 supplement 3B and C](#)). Female survival analysis showed that exposure of 4<sup>th</sup> instar  
175 nymphs to the LC<sub>50</sub> of EB has no impact on female longevity ([Figure 1-figure  
176 supplement 3D](#)). Interestingly, brachypterism (long-wing) female ratio and female  
177 weight were significantly increased after EB exposure ([Figure 1-figure supplement 3E  
178 and F](#)).  
179

180 **Figure 1-figure supplement 3**

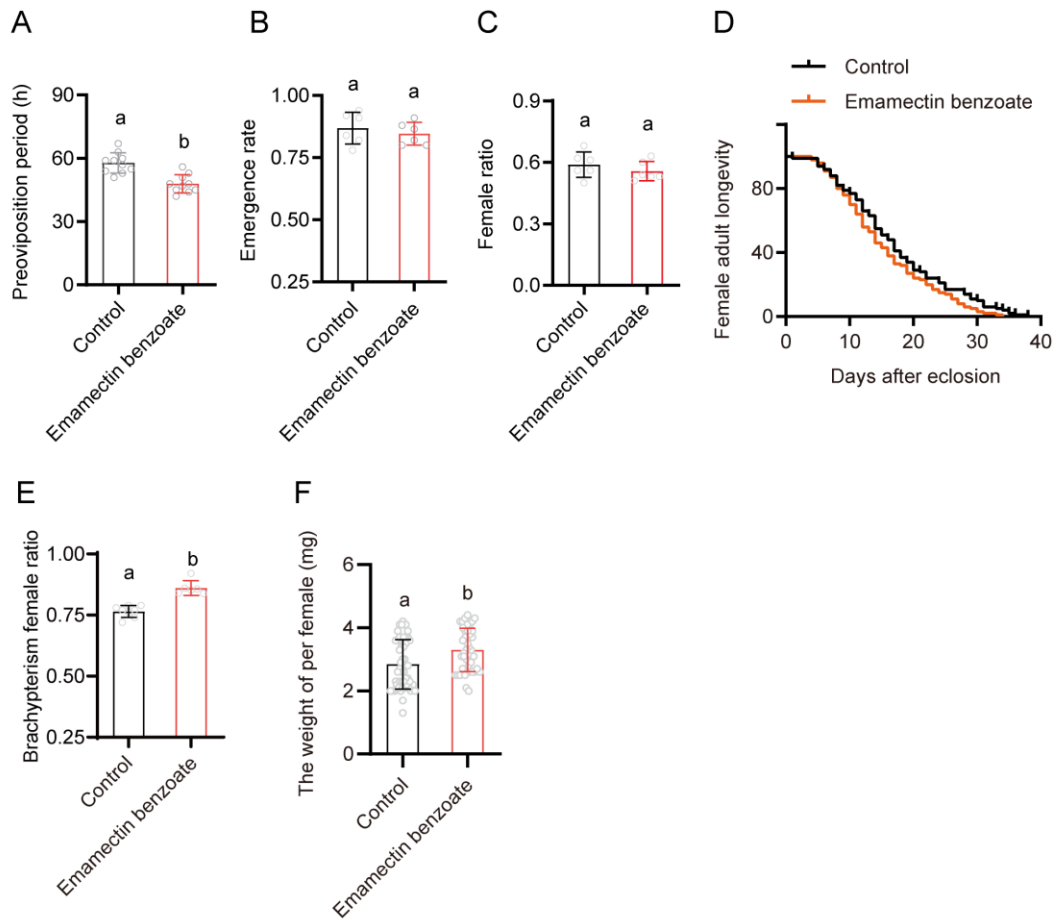

181

182 **Figure 1-figure supplement 3.** The impact of emamectin benzoate on the reproductive

183 fitness of BPH. Fourth instar nymphs were treated with the LC<sub>50</sub> concentration of emamectin

184 benzoate in systemic bioassays. All data are presented as the mean  $\pm$  s.e.m. Different lower-

185 case letters above the bars indicate significant differences (Student's *t* test,  $p < 0.05$ ).

186

187 **EB promotes ovarian development in BPH**

188 To investigate the cause of increased female weight following EB exposure we

189 examined if EB influences ovary development in BPH. We dissected and compared

190 the ovaries of females treated with the LC<sub>50</sub> of EB at 1, 3, 5 and 7 days after eclosion

191 (DAE) with control females. At 3, 5 and 7 DAE, the number of detained eggs of BPH

192 in the EB treated group were significantly higher than that of controls (Figure 2A and  
193 B). We also explored whether EB treatment could enhance or impair oogenesis in  
194 BPH. However, dissection of various developmental stages revealed that emamectin  
195 benzoate treatment has no significant effects on oogenesis (Figure 2C and D).

196 **Figure 2**

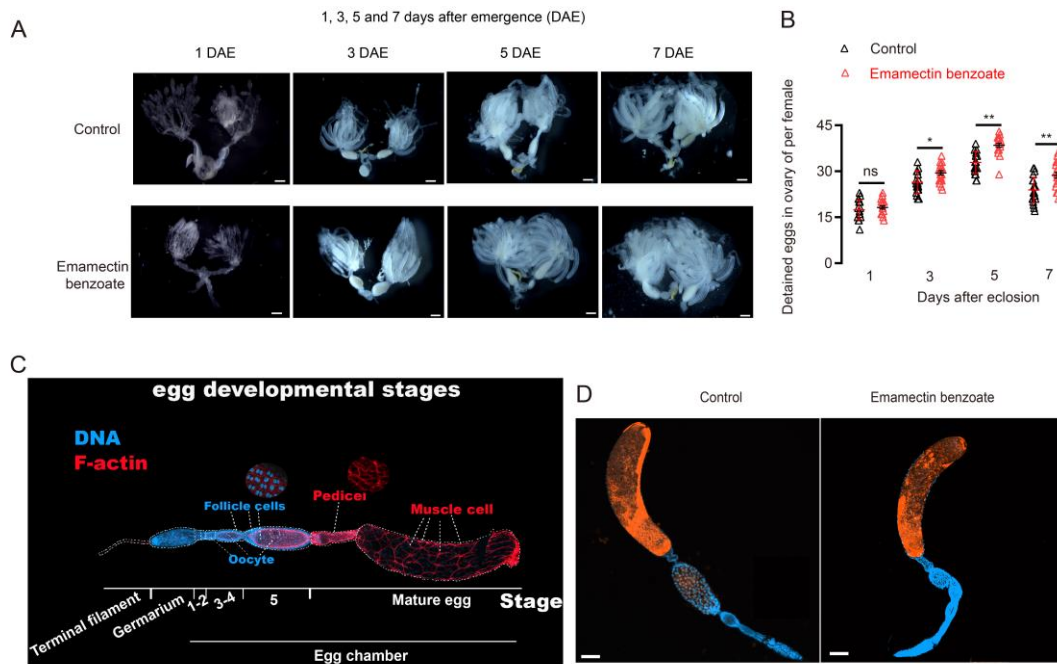

197  
198 **Figure 2.** The impact of emamectin benzoate on ovary development in BPH. Fourth instar  
199 nymphs were treated with the LC<sub>50</sub> concentration of emamectin benzoate in systemic bioassays.  
200 (A) Ovary development in EB treated BPH at 1, 3, 5 and 7 days after eclosion (DAE) compared  
201 to untreated controls. Scale bar = 1,000  $\mu$ m. (B) Number of detained eggs in the ovaries of EB  
202 treated BPH females measured at 1, 3, 5 and 7 DAE compared to controls. All data are  
203 presented as the mean  $\pm$  s.e.m. Asterisks indicate values significantly different from the control  
204 using student *t* test (ns, no significant; \**p* < 0.05 and \*\**p* < 0.01). (C) Different developmental  
205 stages of BPH eggs. (D) No impairment of emamectin benzoate on oogenesis of BPH. Scale  
206 bar = 100  $\mu$ m.

207

208 **EB exposure enhances the abundances of storage macromolecules and**  
209 **circulating sugars in BPH**

210 Nutritional status is an important indicator of reproductive fitness. Thus, to  
211 investigate whether EB affects intermediary metabolism and energy storage of BPH,  
212 glycogen, triacylglyceride (TAG), total protein content, cholesterol and four circulating  
213 carbohydrates were quantified in 4<sup>th</sup> instar BPH nymphs following exposure to the  
214 LC<sub>50</sub> of EB.

215 We found that EB exposure has no impact on glycogen levels ([Figure 2-figure](#)  
216 [supplement 1A](#)). The amounts of TAG in EB-treated BPH were 27% higher ( $p < 0.05$ )  
217 than those in controls, but only in BPH of the late fifth instar (5L) stage, with no  
218 significant differences observed in subsequent developmental stages ([Figure 2-figure](#)  
219 [supplement 1B](#)). The amount of total protein content in EB-treated BPH was higher  
220 than the control groups in the case of all developmental stages from 5L nymph to  
221 7DAE ([Figure 2-figure supplement 1C](#)). EB exposure also increased cholesterol  
222 levels at 4 and 5 DAE ([Figure 2-figure supplement 1D](#)). Compared with the solvent  
223 control, EB treatment caused significant increases ( $p < 0.05$ ) in the levels of sucrose,  
224 glucose, fructose, and trehalose ([Figure 2-figure supplement 1E-H](#)). Thus,  
225 collectively, these data provide evidence that EB exposure leads to energy  
226 mobilization and the metabolism of carbohydrates and lipids in BPH.

227



228 **Figure 2-figure supplement 1**

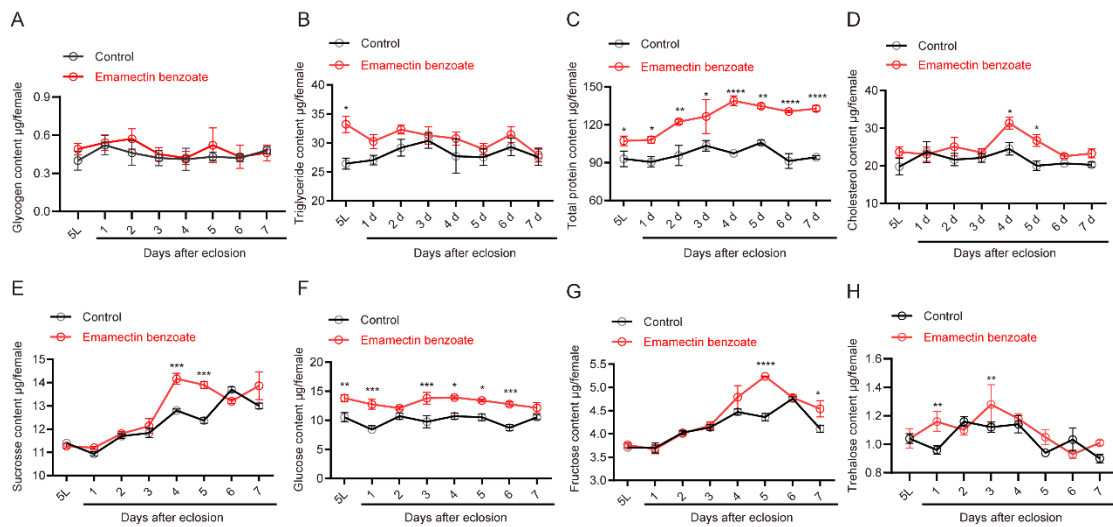

229

230 **Figure 2-figure supplement 1.** Amounts of Glycogen (A), TAG (B), total protein content (C),  
231 cholesterol (D) and four circulating sugars including sucrose, glucose, fructose and trehalose  
232 (E-H) after BPH exposure to EB. All data are presented as the mean  $\pm$  s.e.m. The differences  
233 between the EB-treated and solvent-treated BPH were analyzed using unpaired student *t*-test  
234 (\*,  $p < 0.05$ ; \*\*,  $p < 0.01$ ; \*\*\*,  $p < 0.001$ ; \*\*\*\*,  $p < 0.0001$ ).

235

236 **EB stimulates egg-laying that is mediated by the JH signaling pathway**

237 Given the important role of juvenile hormone (JH) in vitellogenesis and egg  
238 development in insects [19, 25, 27-29], we asked whether EB-treatment could  
239 influence the titer of JH in BPH. As measured by ELISA, the juvenile hormone titer of  
240 BPH nymphs treated with the LC<sub>50</sub> concentration of EB was significantly lower than  
241 that of controls in systemic bioassays during the middle and late stages of the 4<sup>th</sup>  
242 instar (Figure 3A). However, at 2, 3 and 4 DAE, the JH titer in the EB treated group  
243 was significantly higher than that of the control (Figure 3A). Interestingly, the titer of  
244 another important insect hormone, the steroid ecdysone, was not significantly  
245 different between EB-treated BPH and solvent-treated controls (Figure 3-figure

246 [supplement 1](#)). To independently validate the results of ELISA assays, we employed  
247 HPLC-MS/MS to measure JH titer in BPH following EB exposure [[27](#), [30](#), [31](#)]. The  
248 results showed that JH III titer significantly decreased after EB-treatment at the late  
249 4<sup>th</sup> instar nymph stage ([Figure 3A and B](#)), but significantly increased at the third day  
250 after eclosion (3 DAE) ([Figure 3A and C](#)). To further investigate the role of JH in EB-  
251 enhanced fecundity in BPH, we treated BPH with methoprene and pyriproxyfen, JH  
252 analogues or biologically active JH mimics respectively, to determine whether they  
253 can stimulate fecundity in BPH. Both compounds significantly increased egg-laying in  
254 BPH ([Figure 3D](#)). Taken together these results reveal that EB stimulates an  
255 increased in JH titer that induces fecundity in BPH. Since we found that EB could  
256 induce JH synthesis in the BPH, we asked whether EB could influence the  
257 expression of genes that are involved in JH synthesis or degradation. For this we  
258 treated 4<sup>th</sup> instar nymphs of BPH with the LC<sub>50</sub> concentration of EB using systemic  
259 bioassays, and then collected early (5E), middle (5M) and late (5L) stage of 5<sup>th</sup> instar  
260 nymph and 1-7 DAE female adults (DAE) for analysis. Quantitative PCR was then  
261 used to examine the expression of key genes previously implicated in the regulation  
262 of JH [[32](#), [33](#)].

263 Farnesoic acid O-methyltransferase (FAMeT) [[34](#)], is known as an important  
264 enzyme in the JH biosynthetic pathway, catalyzing methylation of farnesoic acid (FA)  
265 to methyl farnesoate (MF) [[33](#)]. We found that this gene was significantly upregulated  
266 in 5M instar nymph to 4 DAE after EB- treatment (1.0-fold to 3.0-fold) ([Figure 3E](#)).  
267 Another gene, juvenile hormone acid methyltransferase (JHAMT) [[33](#), [35](#)], which is

268 involved in the biosynthesis of JH, was also upregulated in EB-treated BPH at 1 to 5  
269 DAE than controls (1.5-fold to 3.0-fold) (Figure 3F). Methoprene-tolerant (*Met*),  
270 belongs the basic helix–loop–helix Per/Arnt/Sim (bHLH-PAS) family of transcription  
271 factors and is the intracellular (nuclear) receptor of JH [36, 37]. The levels of *met*  
272 mRNA increased in EB-treated BPH at the 5M and 5L instar nymph and 1 to 5 DAE  
273 stages compared to controls (1.7-fold to 2.9-fold) (Figure 3G). Krüppel homolog 1  
274 (*Kr-h1*), a transcriptional target of JH signaling, is reported to be sensitive to levels of  
275 JH and its expression levels are directly correlated with JH titers [32, 38, 39]. We  
276 found that *Kr-h1* was significantly upregulated in the adults of EB-treated BPH at the  
277 5M, 5L nymph and 4 to 5 DAE stages (4.7-fold to 27.2-fold) (Figure 3H). Similarly, the  
278 expression levels of vitellogenin (*Vg*), a key downstream component of JH signaling  
279 triggering ovary development in insects including BPH [40], was markedly increased  
280 in females at 2–5 DAE by EB (1.7-fold to 5.5-fold) (Figure 3I). Juvenile hormone  
281 esterase (*JHE*) is the primary JH-specific degradation enzyme that plays a key role in  
282 regulating JH titers [41]. Interestingly, we observed a significant upregulation of *JHE*  
283 mRNA levels in the early and middle 5<sup>th</sup> instar nymph stage followed by  
284 downregulation in 5L instar nymphs of EB-treated BPH (1.3-fold to 2.6-fold) (Figure  
285 3J). In combination these results reveal that EB has profound impacts on the  
286 expression of key genes involved in the synthesis of JH or downstream signaling  
287 pathway genes that might promote egg development.

288 To further understand whether these JH pathway-related genes were involved in  
289 egg-laying behavior in BPH, we performed RNAi experiments to downregulate the

290 expression of *JHAMT*, *Met* and *Kr-h1* (Figure 3-figure supplement 2A-C). We found  
291 that silencing of these three genes downregulated the titer of JH in BPH providing  
292 functional evidence of their role in the regulation of JH (Figure 3-figure supplement  
293 2D). Furthermore, silencing of *Kr-h1* inhibited *FAMeT* and *Vg* gene expression while  
294 increasing *JHE* gene expression (Figure 3-figure supplement 2E-H). Importantly,  
295 silencing of *JHAMT*, *Met* and *Kr-h1* gene in female BPH was also found to suppress  
296 egg-laying (Figure 3K-M). However, this phenotype was rescued by EB treatment,  
297 which restored egg-laying to normal levels in BPH injected with *JHAMT*, *Met* and *Kr-*  
298 *h1* dsRNA (Figure 3K-M). Together these results provide a mechanistic  
299 understanding of how EB enhances fecundity in BPH by modulating the expression  
300 of key genes involved in JH synthesis (Figure 3N).  
301

302 **Figure 3**

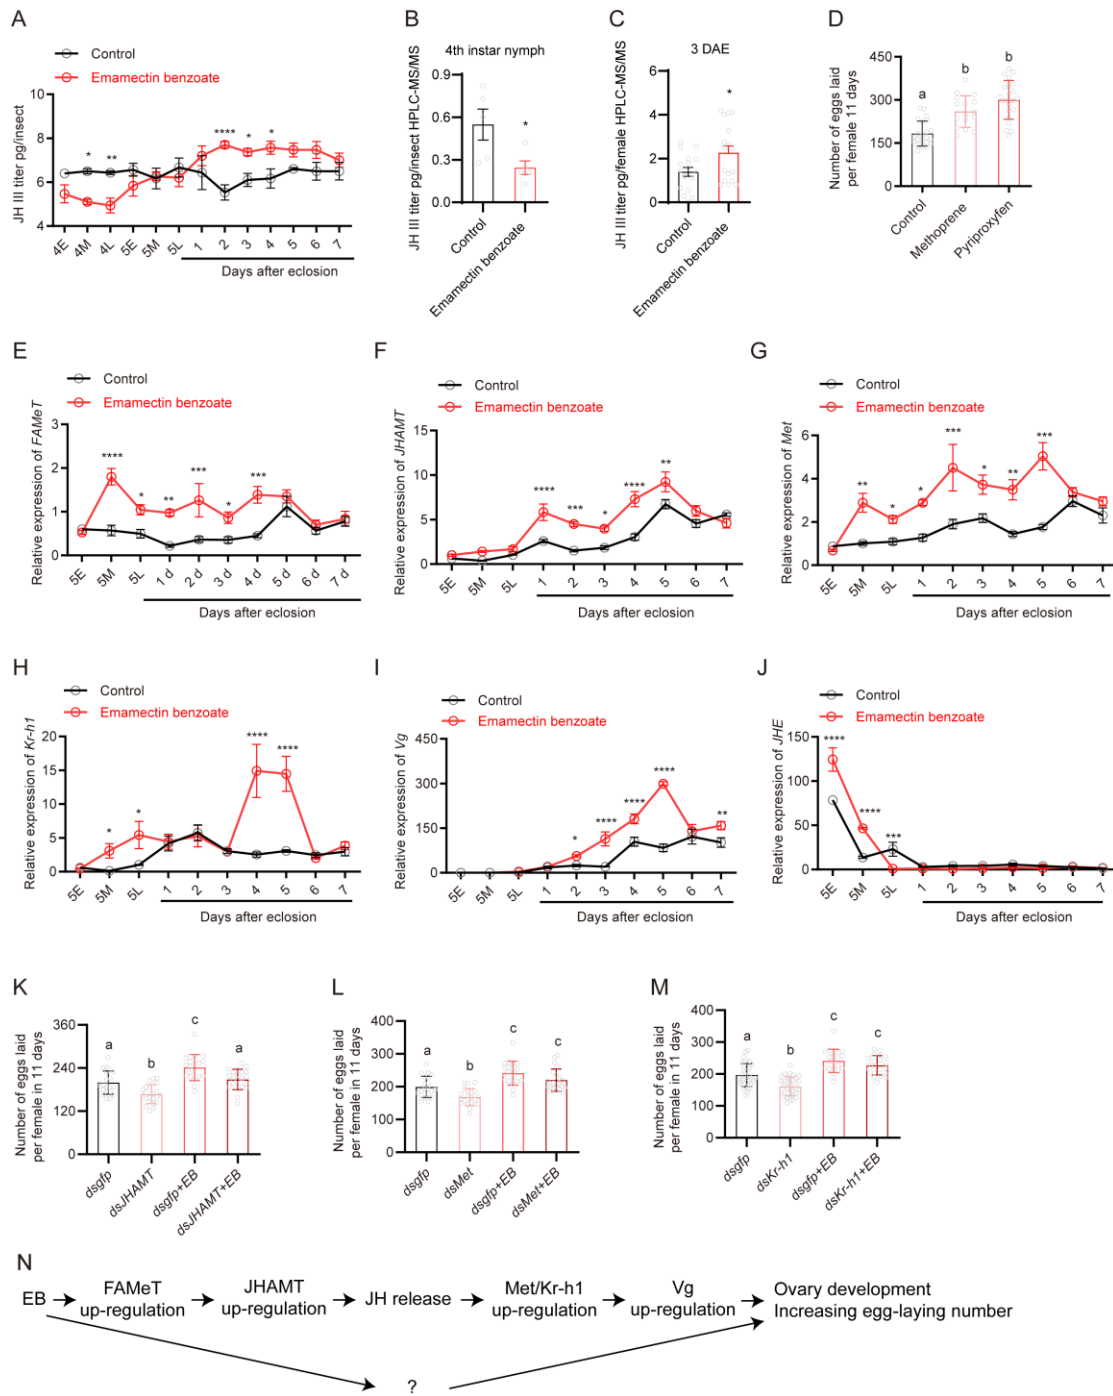

303

304 **Figure 3. EB induced reproduction in BPH is mediated by components of the JH**

305 **signaling pathway.** (A) The titer of JH III (as measured by ELISA assay) at different

306 developmental stages of BPH when 4<sup>th</sup> instar nymphs were treated with the median lethal

307 concentrations of EB. (B and C) The titer of JH III (as measured by HPLC-MS/MS) in BPH

308 females at 4L and 3 DAE when treated with median lethal concentrations of EB. (D) Oviposition

309 rate of BPH when 4<sup>th</sup> instar nymphs were treated with 4 ppm methoprene or 10 ppm

310 pyriproxyfen. (E-J) Expression of selected JH-related genes (*FAMeT*, *JHAMT*, *Met*, *Kr-h1*, *Vg*,  
311 and *JHE*) in EB-treated BPH. (K) Egg production following silencing of *JHAMT* with or without  
312 EB application. (L) Egg production following silencing of *met* with or without EB application. (M)  
313 Egg production after silencing *Kr-h1* with or without EB application. (N) Schematic illustrating  
314 the proposed impact of EB on the JH signaling pathway leading to enhanced reproduction. The  
315 question mark indicates one or more potential additional signals. All data are presented as  
316 means  $\pm$  s.e.m. Student's *t* test was used to compare the two samples. One-way ANOVA with  
317 Tukey's multiple comparisons test was used to compare more than two samples. ns, no  
318 significant difference; Asterisks indicate values significantly different from the control (ns, no  
319 significant; \* $p < 0.05$ , \*\* $p < 0.01$ , \*\*\* $p < 0.001$  and \*\*\*\* $p < 0.0001$ ). Different lower-case letters  
320 above the bars indicate significant differences ( $p < 0.05$ ).

321 **Figure 3-figure supplement 1**

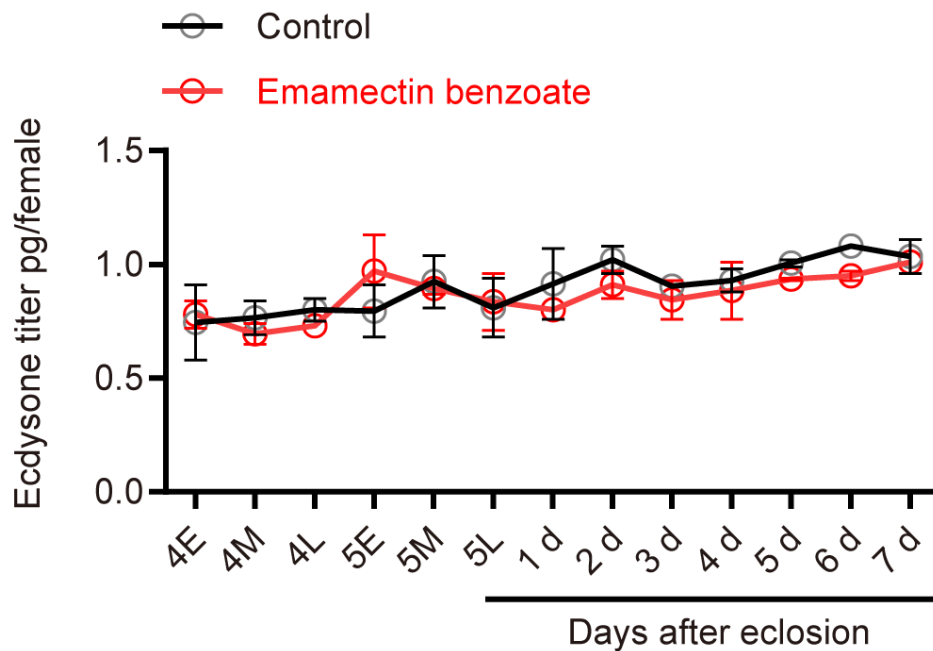

322

323 **Figure 3-figure supplement 1.** Ecdysone titer at different developmental stages of BPH when

324 4<sup>th</sup> instar nymphs were treated with median lethal concentrations of EB.

325

326

327 **Figure 3-figure supplement 2**

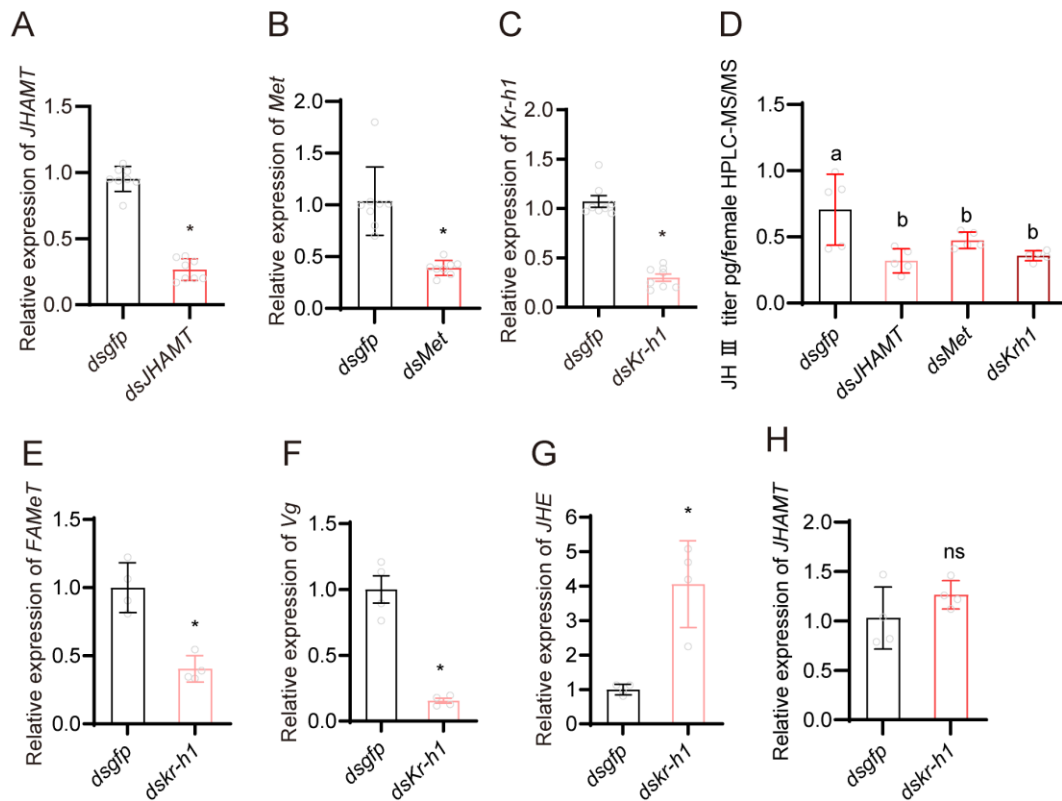

328

329 **Figure 3-figure supplement 2.** (A-C) Expression of *JHAMT* (A), *Met* (B) and *Kr-h1* (C)

330 following RNAi knockdown. (D) The titer of JHIII (as measured by HPLC-MS/MS) at 3 DAE

331 when female adults were injected with *dsJHAMT*, *dsMet*, and *dsKr-h1* at 1 DAE. (E-H)

332 Expression of *FAMeT*, *Vg*, *JHE* and *JHAMT* when *Kr-h1* was silenced in BPH. All data are

333 presented as means  $\pm$  s.e.m. \* $p < 0.05$ ; Mann-Whitney test.

334

335 **EB induces JH biosynthesis through the peptidergic AstA/AstAR signaling**  
336 **pathway**

337 The timing and level of JH biosynthesis can be precisely regulated by the  
338 neuropeptides, stimulatory allatotropins (ATs) and inhibitory allatostatins (Asts), in  
339 many insects [\[42-49\]](#). Insects can, in a species-specific manner, produce one type of  
340 AT and three types of Asts: FGL-amide Ast (AstA) [\[43, 50\]](#); myoinhibitory peptide  
341 (MIP or AstB) and PISCF Ast (AstC) [\[47, 51\]](#). In some species, there also exists two  
342 paralogue genes of AstCs which are named AstCC and AstCCC [\[52, 53\]](#).  
343 Interestingly, the allatostatic activity of these three types of Ast peptides varies  
344 between insect species so that in each species only one type of Ast (for example  
345 AstA) controls JH production [\[47, 48, 51, 54\]](#).

346 Analysis of the BPH neural transcriptome sequence data has revealed the  
347 presence of one AT, four types of Asts and four corresponding receptors, allatotropin  
348 receptor (A16, ATR), AstA receptor (A2, AstAR), AstB (MIP) receptor (A10, AstBR or  
349 MIPR) and AstC receptor (A1, AstCR) [\[55\]](#). We cloned the five neuropeptide genes  
350 (AT, AstA, AstB/MIP, AstCC and AstCCC) and confirmed the sequence obtained from  
351 transcriptome data ([Figure 4-figure supplement 1](#)) [\[55\]](#). Interestingly, we found that  
352 AstC is missing in the genome of BPH and only AstCC and AstCCC are present  
353 ([Figure 4-figure supplement 1](#)). Next, we also cloned their corresponding receptors  
354 [\[52\]](#) including ATR (A16), AstAR (A2), AstBR (A10) and AstCR (A1) which might be  
355 activated by AstCC and/or AstCCC [\[39, 52, 56\]](#). Sequence alignments and  
356 phylogenetic analysis are shown in [Figure 4-figure supplement 2](#).



357 Quantitative PCR was then used to examine if EB treatment could influence the  
358 expression of the genes encoding these neuropeptides and their receptors. Treating  
359 BPH with the LC<sub>50</sub> concentration of EB significantly increased the expression of *AT*,  
360 *ATR* and *AstCCC* while resulting in the downregulation of *AstA*, *AstB/mip*, *AstCC*,  
361 *AstAR* and *AstBR/mipr* at the adult stage (Figure 4A and B, Figure 4-figure  
362 supplement 3A-G). Among these, *AstA* and *AstAR* were the most downregulated  
363 genes after EB treatment (Figure 4A and B, Figure 4-figure supplement 3H) and thus  
364 the *AstA/AstAR* signaling system was selected for subsequent functional analysis.  
365 Silencing of *AstAR* in female BPH using RNAi (Figure 4C), resulted in an increased  
366 number of eggs laid per female compared with *dsgfp*-injected controls (Figure 4D).  
367 Interestingly, silencing *AstAR* also resulted in the upregulation of *FAMeT*, *JHAMT*,  
368 *Met* and *Kr-h1* which are involved in the JH biosynthesis/signaling (Figure 4E-H).  
369 However, *JHE* was not influenced by *AstAR* silencing (Figure 4I). We therefore  
370 investigated whether silencing the *AstAR* gene could influence JH titer in BPH. A  
371 significantly increased JH titer was observed in *AstAR* silenced BPH compared with  
372 controls (Figure 4J). Thus, our data strongly suggest that *AstA* is a key inhibitor of JH  
373 production in BPH.

374 Finally, we investigated whether injection of mature *Ast* and *AT* peptides could  
375 influence the number of eggs laid and JH titer in BPH. We synthesized one *AT*, six  
376 *AstAs* (*AstA1* to *AstA6*), one *AstCC* and one *AstCCC* peptide according to their  
377 determined sequences (Figure 4-figure supplement 1). Indeed, we found that  
378 injection of *AstA1* and *AstA6* reduced the number of eggs laid per female in 48 h

379 (Figure 4K). We also observed that AstA1 injection after 16h and 48h decreased the  
380 JH titer significantly (Figure 4L), and AT injection increased the JH titer after 2h but  
381 levels returned to normal after 4h injection (Figure 4M). Collectively, these results  
382 provide compelling evidence that EB induces reproduction in BPH through the  
383 AstA/AstAR and JH signaling pathways (Figure 4N) and further supports the role of  
384 AstA and AT in regulation of JH titer.

385 **Figure 4**

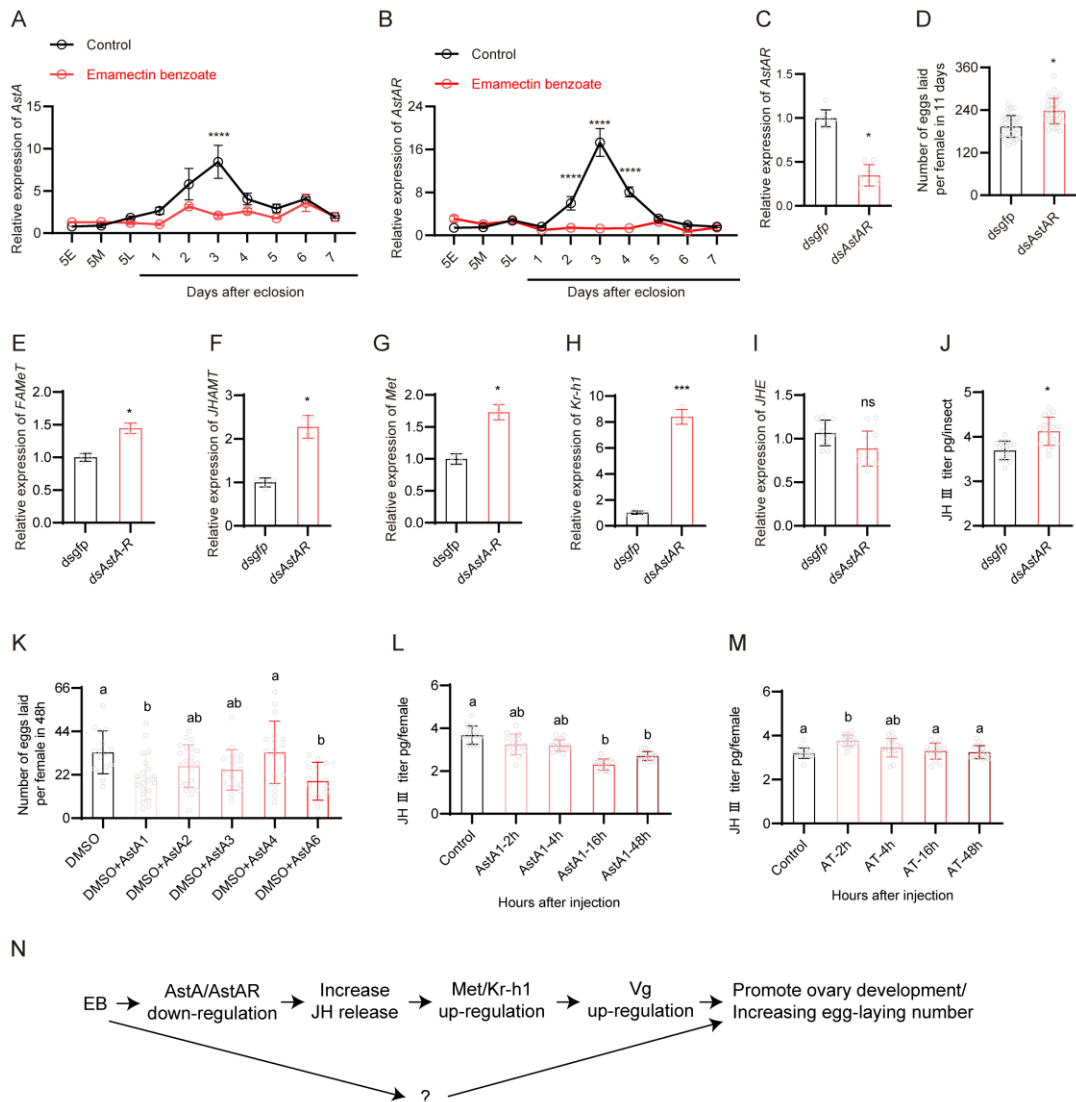

386

387 **Figure 4. EB induced reproduction in BPH is mediated by the AstA/AstAR and JH**  
 388 **signaling pathway.**

389 (A and B) Expression of *AstA* and *AstAR* in different stages of BPH following EB treatment. (C)

390 Downregulation of *AstAR* using RNAi leads to a reduction in mRNA expression level. (D) Egg

391 production in female BPH following silencing of *AstAR* gene. (E-I) Expression of selected JH

392 signaling pathway related genes (*FAMET*, *JHAMT*, *Met*, *Kr-h1* and *JHE*) in *AstAR* silenced BPH.

393 (J) JHIII titer of BPH females after *AstAR* gene silencing determined by HPLC-MS/MS. (K)

394 Number of eggs laid per female in 48h following injection of six AstA1-AstA6 mature peptides

395 and one AT mature peptide. Fifty nanoliter of PBS (as control) and seven peptides (20

396 pmol/insect) were injected into female BPH three days after eclosion. (L and M) The JH III titer

397 of BPH females at different time points following AstA or AT injection. (N) Schematic of the  
398 proposed role of AstA/AstAR in the regulation of JH following EB exposure. The question  
399 mark indicates one or more possible additional signals. All data are presented as means  $\pm$  s.e.m.  
400 Student's *t* test was used to compare the two samples. One-way ANOVA with Tukey's multiple  
401 comparisons test was used to compare more than two samples. ns, no significant difference;  
402 Asterisks indicate values significantly different from the control (ns, no significant; \* $p < 0.05$ , \*\* $p$   
403  $< 0.01$ , \*\*\* $p < 0.001$  and \*\*\*\* $p < 0.0001$ ). Different lower-case letters above the bars indicate  
404 significant differences ( $p < 0.05$ ).  
405

406 **Figure 4-figure supplement 1**

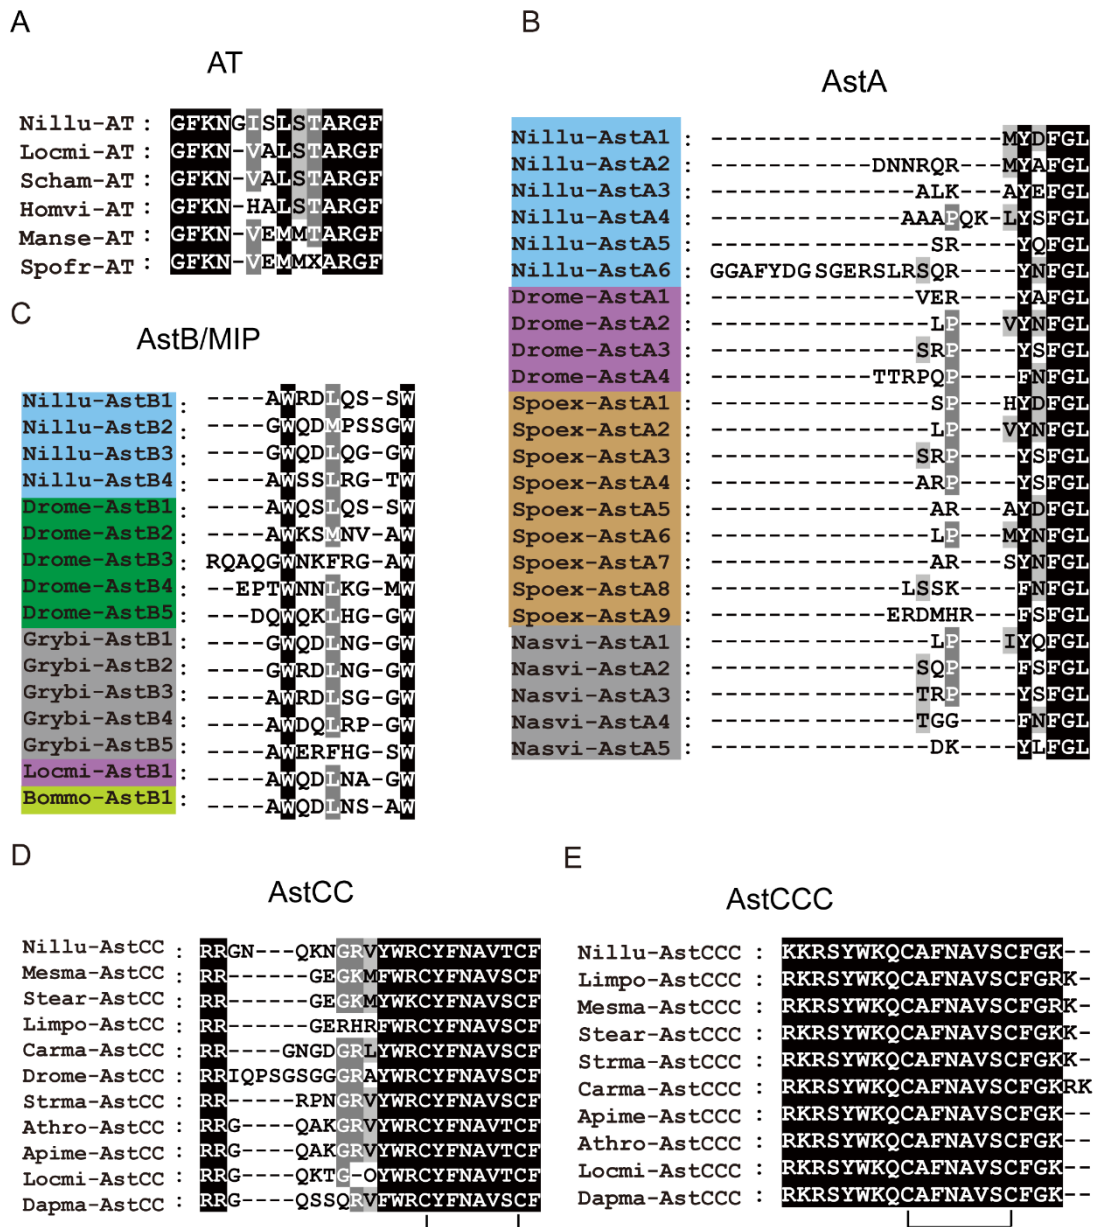

407

408 **Figure 4-figure supplement 1.** Alignments of the amino acid sequences of: (A) AT, (B) AstA,

409 (C) AstB/MIP, (D) AstCC and (E) AstCCC peptides from select species. AT, AstA, AstB/MIP and

410 AstCCC are predicted to have a C-terminal amide. The mature peptides belonging to the same

411 species have been highlighted with the same color. Species names are as follows: Nillu

412 (*Nilaparvata lugens*), Locmi (*Locusta migratoria*), Scham (*Schistocerca americana*), Homvi

413 (*Homalodisca vitripennis*), Manse (*Manduca sexta*), Spofr (*Spodoptera frugiperda*), Drome

414 (*Drosophila melanogaster*), Spoex (*Spodoptera exigua*), Nasvi (*Nasonia vitripennis*), Grybi

415 (*Gryllus bimaculatus*), Bommi (*Bombyx mori*); Mesma (*Mesobuthus martensii*), Stear

416 (*Stegodyphus araneomorph*), Limpo (*Limulus polyphemus*), Carma (*Carcinus maenas*), Strma  
417 (*Strigamia maritima*), Athro (*Athalia rosae*), Apime (*Apis mellifera*), Dapma (*Daphnia magna*).  
418 Black lines under the sequences indicate the locations of the disulfide bridges in the mature  
419 peptides. The accession numbers of the sequences are listed in Figure 4-figure supplement 1  
420 source data.  
421

422 **Figure 4-figure supplement 2**

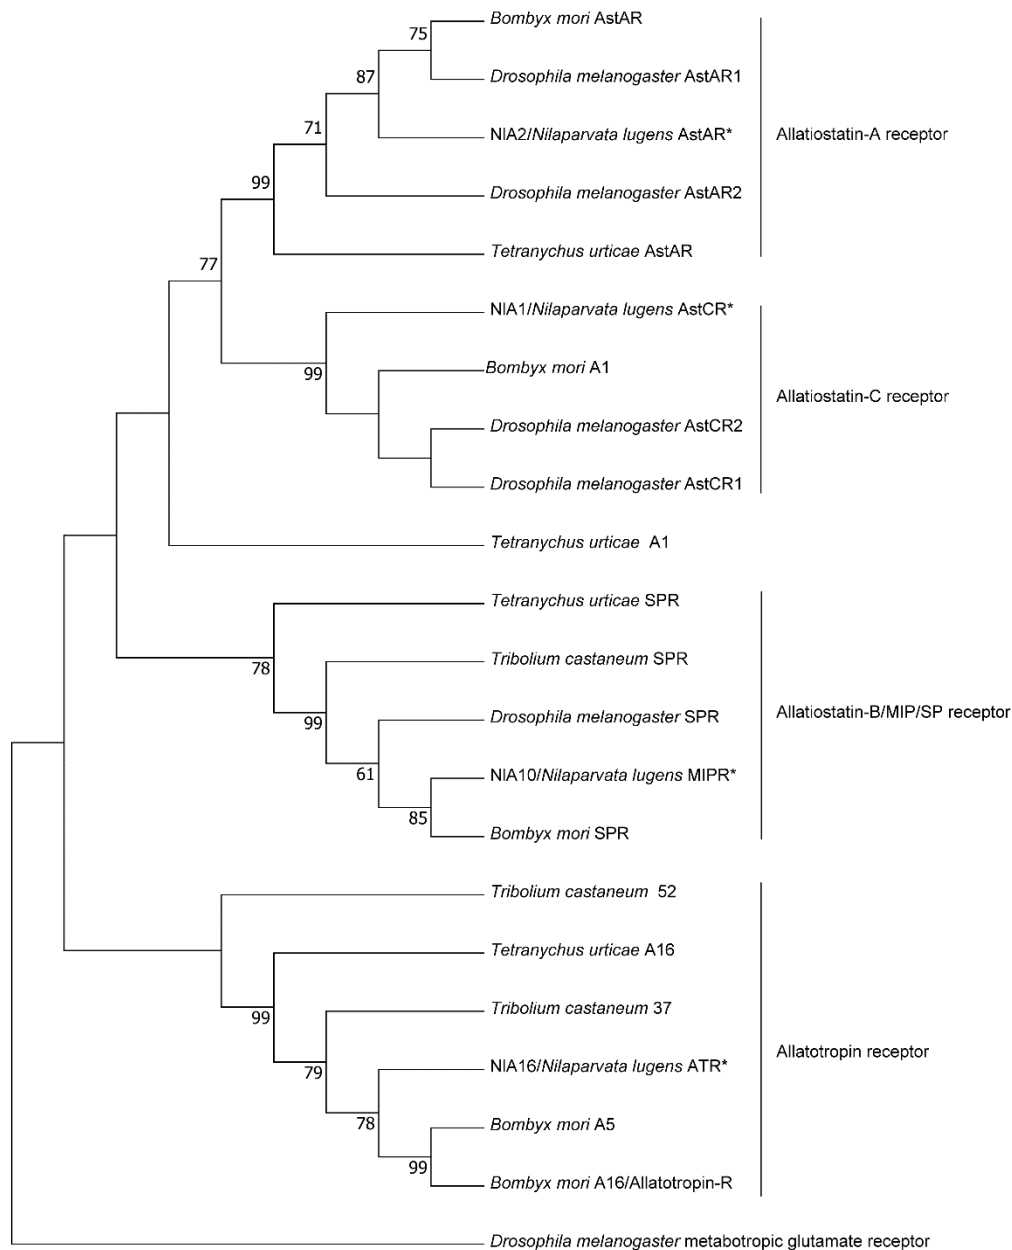

423

424 **Figure 4-figure supplement 2.** Phylogenetic tree of the predicted BPH (\*) allatotropin receptor  
425 (A16, ATR), allatostatins A receptor (A2, AstAR), AstB (MIP) receptor (A10, AstBR or MIPR)  
426 and allatostatins C receptor (A1, AstCR) with other insect species. The tree was generated  
427 using the maximum likelihood method. *Drosophila melanogaster* metabotropic glutamate  
428 receptor was included as an outgroup. The accession numbers of the sequences used for this  
429 phylogenetic tree are listed in Figure 4-figure supplement 2 source data.

430 **Figure 4-figure supplement 3**

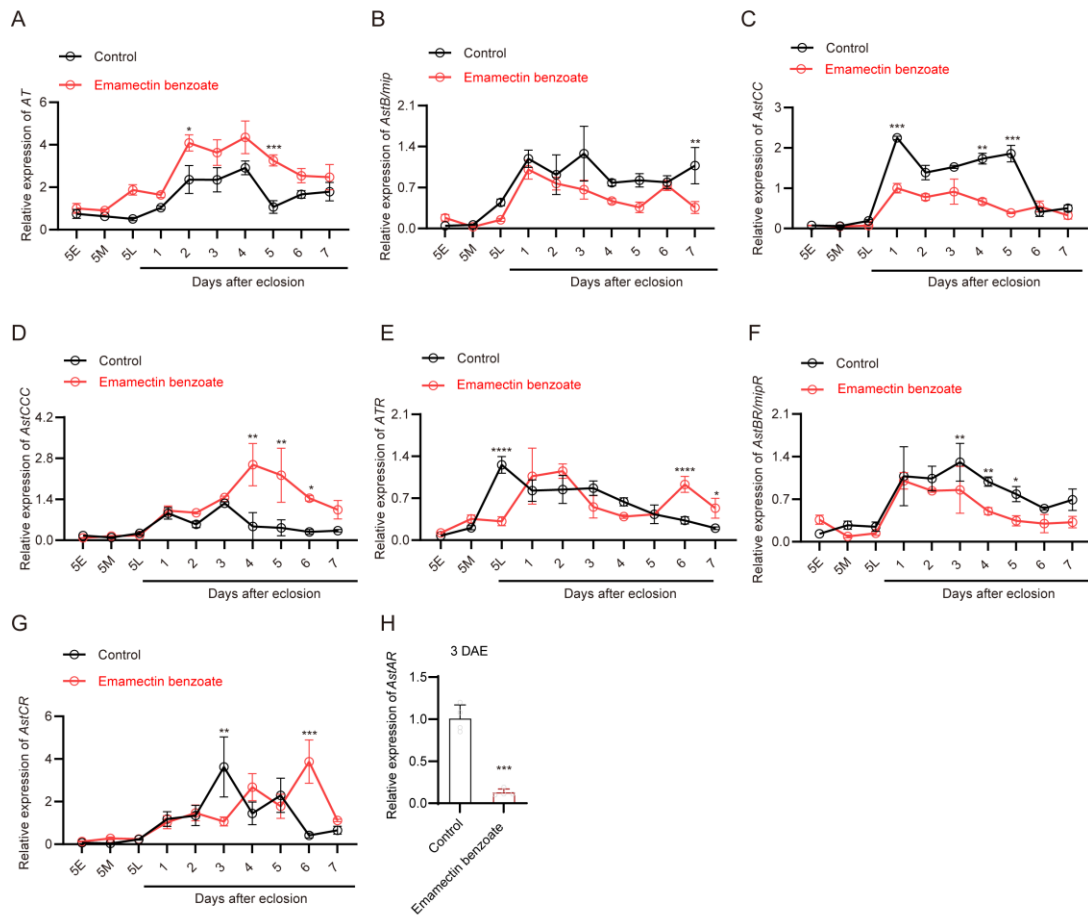

431

432 **Figure 4-figure supplement 3. EB induced changes in the expression of AT, AstB, AstCC,**

433 **AstCCC, ATR, AstBR and AstCR in BPH.** All data are presented as means  $\pm$  s.e.m. Student's

434 t test was used to compare the two samples. ns, no significant difference; Asterisks indicate

435 values significantly different from the control (\* $p$  < 0.05, \*\* $p$  < 0.01, and \*\*\* $p$  < 0.001).

436



437 **EB-enhanced fecundity in BPH is dependent on its molecular target protein the**

438 **GluCl**

439 EB and abamectin, are allosteric modulators, which target glutamate-gated  
440 chloride channels (GluCls) [57-59]. Hence, we examined whether EB-stimulated  
441 fecundity in BPH is influenced by its molecular target GluCl. The full length *GluCl*  
442 coding sequence from BPH was cloned and sequenced (Figure 5-figure supplement  
443 1) and the impact of EB on *GluCl* gene expression examined using quantitative PCR.  
444 Treatment of BPH with the LC<sub>50</sub> concentration of EB significantly downregulated  
445 *GluCl* gene expression at the 5E and 5M nymph stages while upregulating *GluCl*  
446 gene expression at 2 DAE and 5 DAE in the adult stage (Figure 5A). To examine the  
447 role of *GluCl* gene in BPH fecundity, RNAi was used to knockdown expression of this  
448 gene in female BPH (Figure 5B). A significant decrease in the number of eggs laid by  
449 per female was observed in *dsGluCl*-injected insects compared with *dsgfp*-injected  
450 insects (Figure 5C). However, treatment with EB was found to rescue the decreased  
451 egg-laying phenotype induced by *dsGluCl* injection (Figure 5C). To investigate the  
452 mechanism by which *GluCl* expression modulates fecundity we examined if silencing  
453 *GluCl* influences JH titer and JH-related gene expression. Indeed, we observed that  
454 RNAi knockdown of *GluCl* leads to a decrease in JH titer (Figure 5D) and down-  
455 regulation of genes including *JHAMT* which is responsible for JH synthesis, and the  
456 JH signaling downstream genes *Met* and *Kr-h1* (Figure 5E-G). In contrast,  
457 expression of *FAMeT* and *JHE* were not changed in the *GluCl* silencing insects  
458 (Figure 5H and I). We also examined whether silencing *GluCl* impacts the

459 *AstA/AstAR* signaling pathway. Silencing *GluCI* was found to have no impact on the  
460 expression of *AT*, *AstA*, *AstB*, *AstCC*, *AstAR*, and *AstBR*. However, the expression of  
461 *AstCCC* and *AstCR* was significantly upregulated in *dsGluCI*-injected insects ([Figure](#)  
462 [5-figure supplement 2A-H](#)). These results suggest that EB activates *GluCI* which  
463 induces JH biosynthesis and release, which in turn stimulates reproduction in BPH  
464 ([Figure 5J](#)).

465

466 **Figure 5**

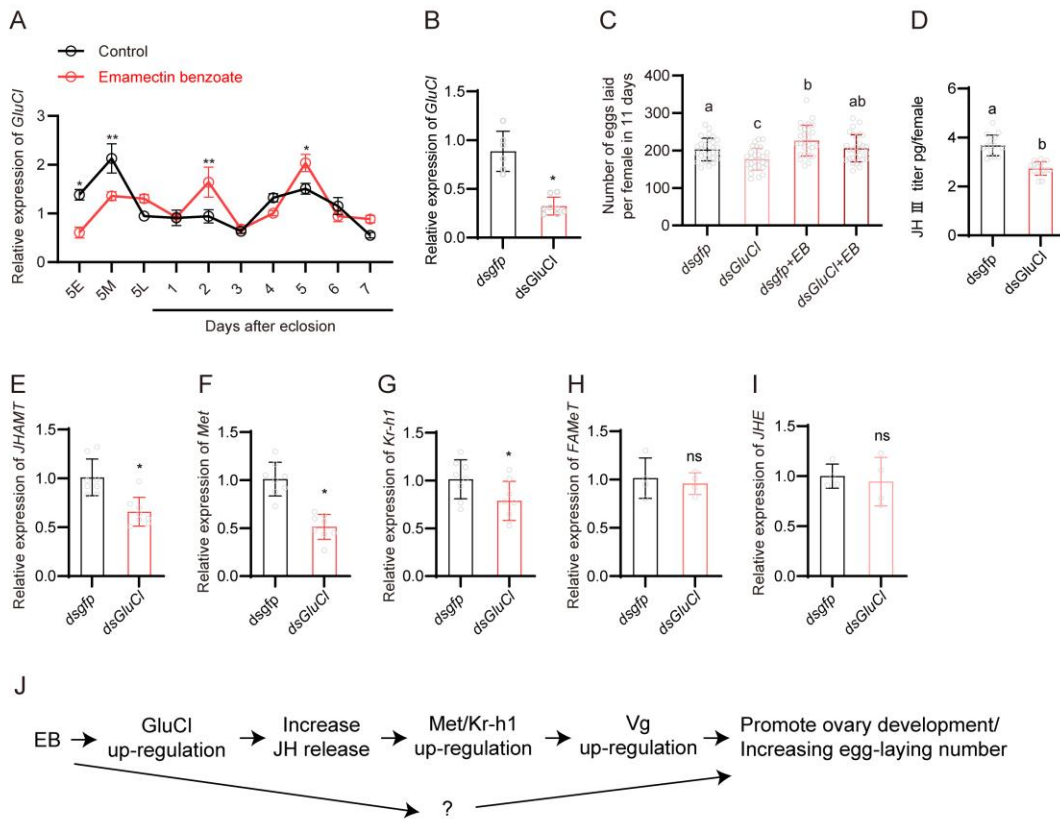

467

468 **Figure 5. EB induced reproduction in brown planthoppers through its molecular target**  
 469 **protein *GluCI*.**

470 (A) Expression of *GluCI* in EB-treated and untreated BPH. (B) Expression of *GluCI* following  
 471 injection of *dsGluCI* in BPH. (C) Egg production after *GluCI* gene knockdown in EB-treated and  
 472 untreated BPH. (D) The JH III titer of BPH females after *GluCI* gene silencing as quantified  
 473 using the ELISA method. (E-I) Expression patterns of selected JH-related genes (*JHAMT*,  
 474 *Met*, *Kr-h1*, *FAMEt* and *JHE*) in *GluCI* silenced BPH. (J) Schematic of the proposed role of *GluCI* as  
 475 a molecular target of EB and EB-enhanced reproduction in BPH. The question mark indicates  
 476 one or more possible additional signals. All data are presented as means  $\pm$  s.e.m. Student's t  
 477 test was used to compare the two samples. One-way ANOVA with Tukey's multiple  
 478 comparisons test was used to compare more than two samples. ns, no significant difference;  
 479 Asterisks indicate values significantly different from the control (ns, no significant; \* $p < 0.05$  and  
 480 \*\* $p < 0.01$ ). Different lower-case letters above the bars indicate significant differences ( $p < 0.05$ ).

481 **Figure 5-figure supplement 1**

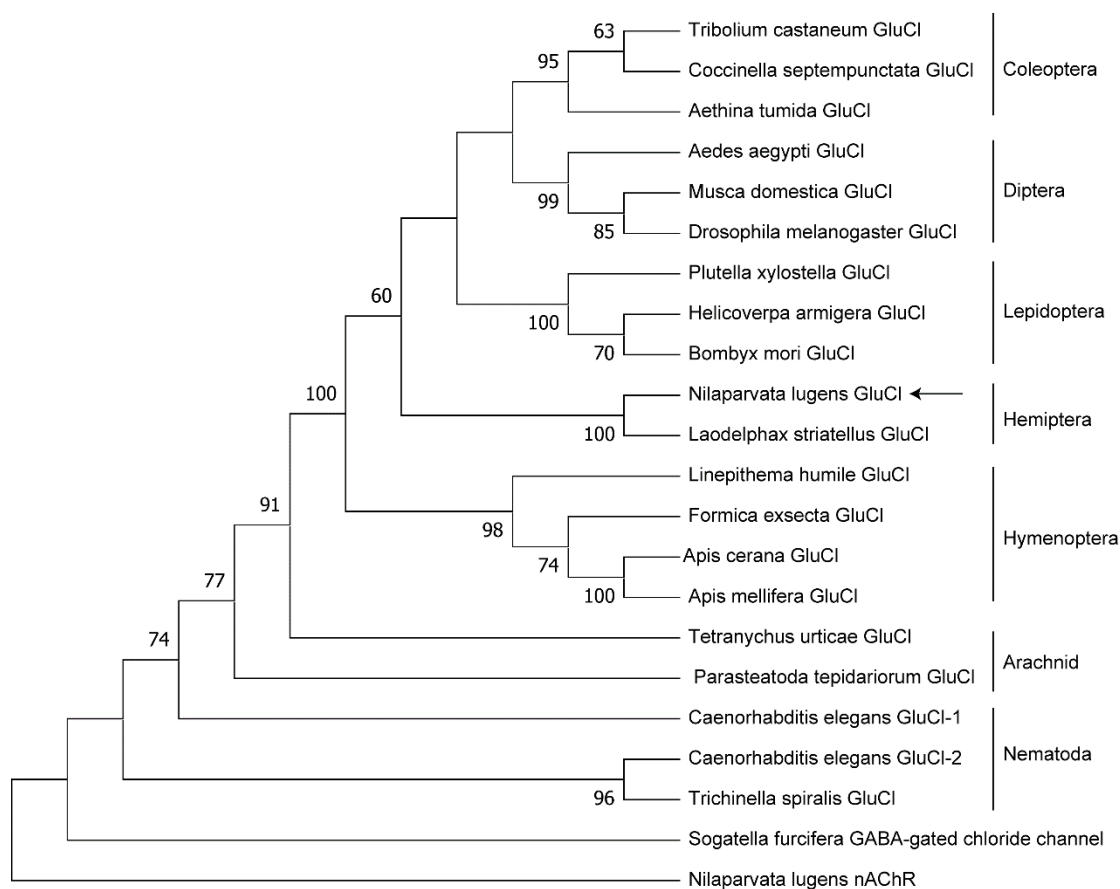

482

483 **Figure 5-figure supplement 1.** Phylogenetic analysis of glutamate-gated chloride channels in  
484 different species. The numbers at the nodes of the branches represent the percentage  
485 bootstrap support (1000 replications) for each branch. The *Sogatella furcifera* GABA-gated  
486 chloride channel and *Nilaparvata lugens* nAChR were used as outgroup. Alignment was  
487 performed with amino acid sequences from TM1-7. The receptor names are listed in the tree.  
488 The accession numbers of the sequences used for this phylogenetic tree are listed in [Figure 5-](#)  
489 [figure supplement 1 source data](#).

490

491 **Figure 5-figure supplement 2**

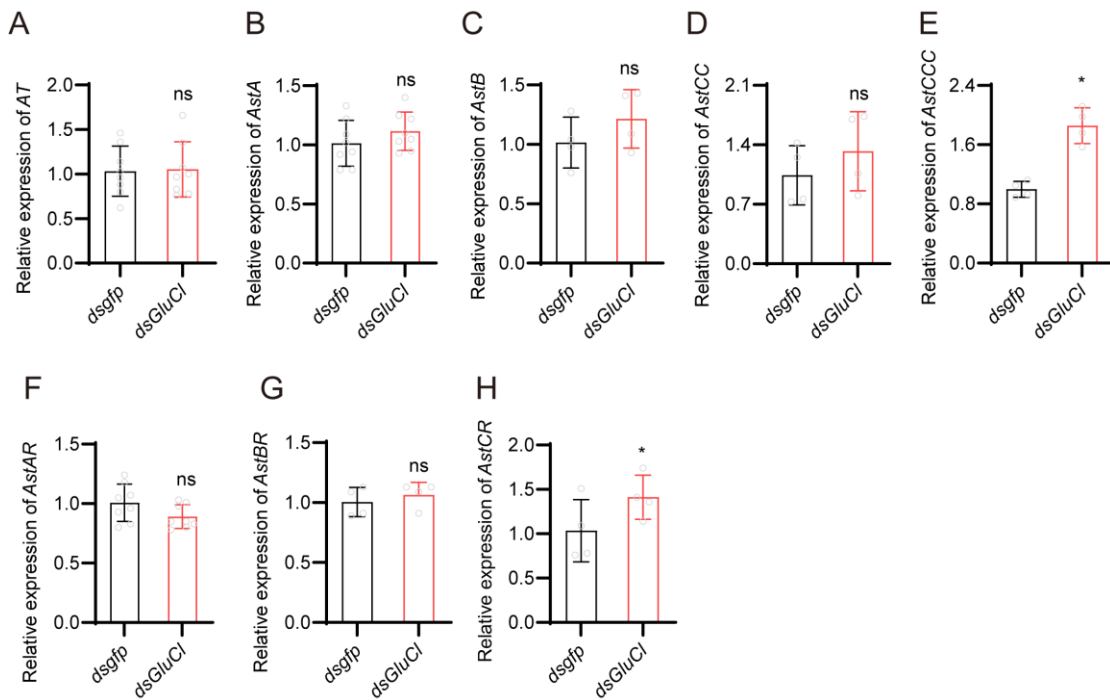

492

493 **Figure 5-figure supplement 2.** The expression of *AT*, *AstA*, *AstB*, *AstCC*, *AstCCC*, *AstAR*,

494 *AstBR* and *AstCR* in BPH injected with *dsGluCI* or *dsGfp*. All data are presented as means  $\pm$

495 s.e.m. Student's *t* test was used to compare the two samples. ns, no significant. Different lower-

496 case letters above the bars indicate significant differences ( $p < 0.05$ ).

497

498 **Discussion**

499 Pesticide-induced resurgence of pest insects is a serious problem in rice and  
500 several other cropping systems [3]. However, the mechanisms underpinning pesticide-  
501 enhanced reproduction in insects remain poorly understood. Here we reveal that a  
502 suite of molecular actors underlie this trait that, in combination, mediate profound  
503 physiological changes in the reproductive fitness of female BPH. Our data provide  
504 fundamental insights into the molecular mechanisms by which xenobiotics modify  
505 insect reproduction and have applied implications for the control of a highly damaging  
506 crop pest. We discuss these topics below.

507

508 **Sublethal doses of GluCl modulators, EB and abamectin, stimulates fecundity in**  
509 **BPH**

510 We show that in both contact and systemic assays EB and abamectin stimulate  
511 reproduction in BPH. Thus, insecticide-enhanced reproduction is likely a key factor in  
512 the BPH resurgence observed when farmers use EB and abamectin to control  
513 leaffolders in rice crops in China [26]. Although this is the first report of sublethal doses  
514 of avermectins enhancing insect fecundity, our findings are consistent with previous  
515 studies which have shown that certain insecticides, herbicides and fungicides stimulate  
516 BPH reproduction [3, 7, 14, 60-65]. Intriguingly, we show that EB only induces fecundity  
517 in female adults and is specific to BPH, with EB exposure failing to enhance  
518 reproduction in two related species, the small brown planthopper, *L. striatellus* and the  
519 white backed planthopper, *S. furcifera*, or the model insect *D. melanogaster*. Thus, the

520 mechanisms underpinning this trait appear to act exclusively on female BPH and may  
521 be specific to this species.

522 Pesticides may stimulate insect reproduction through a variety of physiological and  
523 molecular mechanisms. Our data reveal that exposure to sub-lethal concentrations of  
524 EB results in profound changes to female BPH fitness, leading to increases in female  
525 weight, total protein content, cholesterol content, sugar content and egg production  
526 and decreases in duration of the preoviposition period. Some of these findings exhibit  
527 parallels with previous studies, which demonstrated that treating third-instar BPH  
528 nymphs with either deltamethrin, triazophos, or imidacloprid led to increased soluble  
529 sugar levels in the corresponding adults [66]. Such metabolites provide the energy that  
530 drives BPH reproduction and resurgence [3]. Thus, together with prior work, our results  
531 suggest that pesticides associated with resurgence stimulate nutritional intake in BPH  
532 to fuel enhanced energy-intensive reproduction.

533

#### 534 **The JH signaling pathway plays an essential role in EB-induced fecundity in BPH**

535 JH is a pleiotropic hormone which plays important roles in development and  
536 reproduction in insects [19, 67]. Circulating JH titers are regulated by factors that  
537 control JH production in the corpora allata including biosynthetic enzymes and  
538 catabolic enzymes that regulate JH levels. Our results show that EB increases  
539 circulating JH III titers in BPH females over 2–4 days after eclosion (DAE) and  
540 promotes ovary development. Previous studies have reported that triazophos and  
541 deltamethrin treatments also lead to increased circulating JH III titers in BPH females

542 over 1–3 days post emergence. Similarly, jinggangmycin treatments were found to lead  
543 to increased JH titers (by approximately 45–50%) in BPH females over two days post  
544 emergence [68]. Thus our findings, in combination with these previous studies,  
545 demonstrate that insecticide treatments can have dramatic effects on the regulation of  
546 key insect hormones involved in pest reproduction which can in turn drive pesticide  
547 resurgence.

548 Although increased JH titers following pesticide exposure have been correlated  
549 with reduced levels of active JH esterase during the first three days PE [6], the type  
550 and number of mechanisms mediating the observed increase in hormone titer has  
551 remained an open question. Our data reveal that elevated JH titer in EB-exposed BPH  
552 is associated with the upregulation of genes that encode biosynthetic enzymes for JH  
553 (*JHAMT*) and downstream signaling genes that can induce *vg* gene expression (*met*  
554 and *kr-h1*). Using RNAi we provide functional evidence of the role of these genes in  
555 the regulation of JH III and fecundity of female BPH, and demonstrate that EB can  
556 restore the reduction in egg production resulting from the knockdown of *JHAMT*, *met*  
557 and *kr-h1* expression.

558 JHAMAT is an enzyme that catalyzes the conversion of inactive precursors of JH to  
559 active JH in the final stages of JH biosynthesis [33, 35]. Interestingly, while it has not  
560 been previously implicated in pesticide resurgence, treatment of the stored product  
561 pest *Sitotroga cerealella* with diallyl trisulfide, an insecticidal compound in garlic  
562 essential oil, was found to increase JHAMT mRNA levels [69]. Because JHAMAT is the  
563 key rate-limiting enzyme in regulation of JH titer our results suggest that its enhanced



564 expression is a key molecular mechanism of pesticide resurgence in BPH.

565 Met is a ligand-activated member of the basic helix–loop–helix Per/Arnt/Sim  
566 (bHLH-PAS) transcription factors and is the intracellular receptor for JH [36, 37]. Kr-h1  
567 is a zinc finger protein that acts downstream of Met and is expressed in response to  
568 JH signaling. Although the genes encoding these proteins have not been previously  
569 linked to pesticide resurgence, our finding that they are upregulated following EB  
570 exposure, and demonstration of their role of in promoting fecundity, is consistent with  
571 previous studies. Specifically, treatment of BPH with JH III or the insecticidal analogues  
572 methoprene or pyriproxifen was found to induce the expression of *Kr-h1* [70].  
573 Furthermore, knockdown of *Met* and *Kr-h1* in BPH brachypterous females was found  
574 to result in delayed ovariole development and this was significantly more pronounced  
575 than the response observed in BPH treated separately with *dsNIMet* or *dsNIKr-h1* [71].  
576 This finding provides evidence of a possible interaction between *Met* and *Kr-h1* and,  
577 in combination with our data, suggests that *Met* and *Kr-h1* may act in concert to  
578 mediate EB-enhanced fecundity.

579

#### 580 **EB-induced fecundity in BPH is dependent on the allatostatin signaling pathway**

581 In addition to regulatory proteins that promote JH production, insects have  
582 peptides that inhibit JH biosynthesis. These include the allatostatins: FGLamides  
583 (FGLa; AstA), the W(X)6Wamides (AstB), and the PISCFs (AstC) [47, 48, 54, 55, 72,  
584 73]. Interestingly, our results showed that EB exposure results in the marked  
585 downregulation of the expression of the genes encoding allatostatin *AstA* and its

586 receptor *AstAR*. We provide clear evidence of the functional impact of this on JH  
587 synthesis and BPH fecundity by: i) demonstrating that RNAi knockdown of *AstAR*  
588 expression results in increased JH titer and enhanced female egg production, and, ii)  
589 showing that injection of female BPH with synthetic AS<sub>T</sub>A peptide reduces JH titer and  
590 decreases egg production. Thus, our data provide unequivocal evidence that AstA is a  
591 key inhibitor of JH production in BPH. This finding is consistent with previous work  
592 which has shown that FGLa/ASTs inhibit JH biosynthesis in cockroaches, and termites  
593 [43, 74]. To our knowledge, our study is the first report of insecticides inhibiting the  
594 expression of the neuropeptide receptor, *AstAR*, and linking this to increases in JH titer  
595 and enhanced reproduction in insects.

596 Interestingly knockdown of *AstAR* resulted in significant increases in the  
597 expression of genes involved in JH synthesis/signaling including *FAMeT* and *JHAMT*  
598 *Met* and *Kr-h1*. Related to this finding, previous work has shown that knockdown of the  
599 AstA receptor gene, *Dar-2*, in *D. melanogaster* results in changes in the expression of  
600 genes encoding Drosophila insulin-like peptides (DILPs) and adipokinetic hormone  
601 (AKH) signaling proteins [75]. Together with our findings, this demonstrates that AstA  
602 receptors may modulate the expression of numerous downstream genes involved in  
603 metabolism, energy store and reproduction. In the case of pesticide resurgence our  
604 results imply significant cross-talk in the expression of genes that inhibit JH production  
605 and those that promote it.

606

607 **The GluCl plays an essential role in EB-induced fecundity in BPH**

608 EB and abamectin are allosteric modulators of GluCl<sub>s</sub> [57-59]. Our data revealed  
609 that EB exposure modifies expression of the GluCl in BPH, and knockdown of GluCl  
610 expression resulted in a reduction in both JH levels and egg production. Interestingly,  
611 the GluCl has been reported to inhibit the biosynthesis of JH in the cockroach,  
612 *Diploptera punctata* [76]. Recent work has also reported that modulation of  
613 glutamatergic signals may contribute to the photoperiodic control of reproduction in  
614 bean bug, *Riptortus pedestris* [77]. Interestingly, work on *D. punctata* has revealed that  
615 application of the GluCl channel agonist ivermectin, which like EB belongs to the  
616 avermectin family, caused a decline in JH synthesis in corpus allatum glands [76].  
617 While the inhibitory effect of ivermectin observed in this previous study differs from the  
618 activating effect of EB we observed in our study, it is consistent with our finding of a  
619 role for GluCl channel in the regulation of JH regulation. Interestingly, we found that  
620 knockdown of *GluCl* gene expression results in the down-regulation of *JHAMT*, *Met*  
621 *and Kr-h1*, further revealing significant convergent relationships between genes  
622 underpinning pesticide resurgence.

623

## 624 **Conclusion**

625 Our study has revealed a diverse suite of genes that act in combination to enhance  
626 JH titer and thus fecundity following BPH exposure to EB. A schematic of how these  
627 factors promote ovary development in the adult stage of *N. lugens* through the JH  
628 signaling pathway is provided in Figure 6. Our findings provide the foundation for  
629 further work to understand exactly how these genes interact and the mechanisms by

630 which their expression is activated or repressed by EB. Furthermore, our findings  
631 provide fundamental insights into the molecular response in insects to xenobiotic  
632 stress and illustrate that pesticides can have unexpected and negative impacts on pest  
633 populations. In this regard our findings also have applied implications for the control of  
634 a highly damaging crop pest. Previous studies have reported that avermectins such as  
635 abamectin are toxic to the wolf spider *Pardosa pseudoannulata*, which is the main  
636 predator of BPH in rice crops [78, 79]. Thus, these insecticides both stimulate  
637 reproduction in BPH while killing their natural enemies providing a 'perfect storm' for  
638 damaging BPH outbreaks. Based on these findings, to avoid BPH resurgence, we  
639 suggest that the GluCl<sub>s</sub>, EB and abamectin, should not be (or rarely be) applied to rice  
640 plants at growth stages when BPHs are present. On a more optimistic note, our  
641 findings have identified numerous genes that play key roles in BPH reproduction and  
642 thus represent promising targets for the development of novel controls against this  
643 important pest.

644

645 **Figure 6**

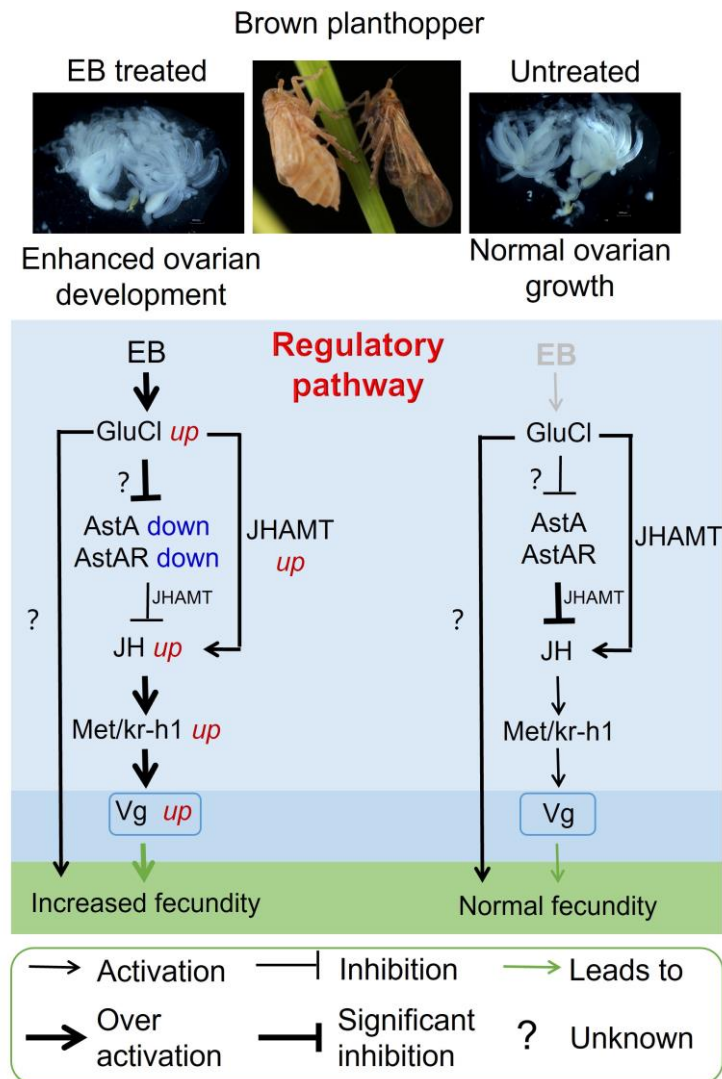

646

647 **Figure 6. Schematic of the proposed regulatory pathway of EB-enhanced fecundity**

648 **in BPH.** Enamectin benzoate (EB) exposure results in the upregulation of genes that promote

649 JH production (*JHAMT*, *Met* and *Kr-h1*) and the downregulation of genes that inhibit it

650 (allatostatin, *AstA* and allatostatin A receptor, *AstAR*). This transcriptome reprogramming is

651 dependent on the action of EB on its molecular target the glutamate-gated chloride channel

652 (*GluCl*) receptor. The resulting increased JH titer promotes *vg* synthesis and increased

653 fecundity in EB exposed insects. We observe significant cross-talk in the expression of genes

654 that inhibit JH production and those that promote it, with *AstAR* inhibiting the expression of

655 *JHAMT*, *Met* and *Kr-h1* and *GluCl* activating the expression of *JHAMT* which is responsible for

656 JH synthesis, and the JH signalling downstream genes *Met* and *Kr-h1*.

## 657 **Materials and methods**

### 658 **Insects**

659 BPH was initially collected from Wanan, JiangXi Province in 2020, reared on  
660 'Taichung Native 1' (TN1) rice seedlings in the laboratory without exposure to any  
661 insecticides. The strain was maintained in a climatic chamber at  $27 \pm 1^\circ\text{C}$ , with relative  
662 humidity of  $70 \pm 10\%$  and a light: dark = 16 h: 8 h photoperiod.

### 663 **Chemicals**

664 Emamectin benzoate (95.2%) was obtained from Hebei Weiyuan Co., Ltd. (Hebei,  
665 China). Abamectin (96.8%) was obtained from Hebei Weiyuan Co., Ltd. (Hebei, China).  
666 Pyriproxyfen (98%) was obtained from Shanghai Shengnong Co., Ltd. (Shanghai,  
667 China). Methoprene (S)-(+)(mx7457-100mg) was purchased from Shanghai MaoKang  
668 Biotechnology Co., Ltd., (Shanghai, China). Juvenile hormone standard sample  
669 (J912305-10mg) was purchased from Shanghai Macklin Biotechnology Co., Ltd.,  
670 (Shanghai, China).

### 671 **Bioassay**

672 Different life stages of insects were used to perform bioassay to investigate the  
673 effects of insecticide on nymphs and adults. To test whether treatment of the nymph  
674 stage of insects would promote reproduction in female, we used 4<sup>th</sup> instar nymphs of  
675 BPH or 3<sup>rd</sup> instar nymph of *Laodelphax striatellus* and *Sogatella furcifera* to perform  
676 bioassays. To test whether treatment of the adult stage of insects would promote  
677 reproduction in female, we used newly emerged male and female BPH.

678 **Systemic route:** The rice-seeding dipping bioassay method was used to evaluate

679 the susceptibility of BPH, *L. striatellus* and *S. furcifera* to EB. Technical-grade  
680 insecticides were dissolved in acetone as stock solution then diluted in a series of six  
681 concentrations with water containing 0.1% Triton. Selected rice seedlings at the 6-8  
682 cm growth stage were dipped in insecticide solutions for 30 s and then air-dried at  
683 room temperature. The roots of the rice seedlings were wrapped with cotton strips and  
684 placed seedlings placed in a plastic cup 5 cm in diameter. Fifteen insects were  
685 introduced into each plastic cup for each replicate. The top of the cup was then sealed  
686 with gauze to prevent escape. All experiments comprised at least three biological  
687 replicates. Control rice seedlings were treated with 0.1% Triton X-100 water solution  
688 only. All treatments were maintained under standard conditions of  $27 \pm 1$  °C and 70–  
689 80% relative humidity with a 16 h light/8 h dark photoperiod. Mortality was assessed  
690 after 4 d for *N. lugens* or 2 d for *L. striatellus* and *S. furcifera* after treatment with  
691 insecticides. The insects were considered dead if they were unable to move after a  
692 gentle prodding with a fine brush.

693 For *Drosophila* larvae bioassay, we adopted a method described previously in our  
694 lab with minor modifications [80]. Briefly, twenty third instar larvae were placed in fly  
695 vials containing fly food (based on corn powder, brown sugar, yeast and agar)  
696 supplemented with EB of different concentrations. Four concentrations (LC<sub>10</sub>, LC<sub>30</sub> and  
697 LC<sub>50</sub>) were tested together with a negative (no insecticide) control. For *Drosophila* adult  
698 bioassays, we selected virgin females three days after eclosion. Several  
699 concentrations were overlaid onto fly food in standard *Drosophila* vials and allowed to  
700 dry overnight at room temperature. 15 adult flies (three days after eclosion) were then

701 added to each vial and mortality assessed after 2 d. Four replicates were carried out  
702 for each concentration. Control mortality was assessed using vials containing food with  
703 solvent minus insecticide.

704 **Contact route:** For topical bioassays working insecticide solutions were prepared  
705 in acetone. 4<sup>th</sup> instar nymphs or newly emerged males/females were anesthetized with  
706 carbon dioxide for 5 s, and then 0.04 µl/insect test solution applied topically to the  
707 dorsal plates with a capillary micro-applicator [26]. Insects were then placed in an  
708 artificial climate incubator with a temperature of 27±1°C, a photoperiod of 16:8 h (L:D),  
709 and a humidity of 70%±10%. Mortality was determined 2 d after treatment. Data with  
710 over 20% mortality in the control treatment were discarded, and the assay was  
711 repeated at least three times.

## 712 **Fecundity assays**

713 Fourth instar nymphs of BPH and 3<sup>rd</sup> instar nymph of *L. striatellus* and *S. furcifera*  
714 were treated with the LC<sub>15</sub> and LC<sub>50</sub> of EB, and then transferred to fresh rice seedlings.  
715 After eclosion, the adults were used in the following experiment. Newly emerged  
716 treated adults and untreated adults were paired to produce four groups: untreated  
717 males and untreated females (♂ck×♀ck; ck indicates untreated); untreated males and  
718 treated females (♂ck×♀t; t indicates insecticide treated); treated males and untreated  
719 females (♂t×♀ck); treated males and treated females (♂t×♀t). Each group comprised  
720 at least 10 mating pairs. All pairs were transferred to glass cylinders (diameter 5 cm  
721 and height 20 cm) containing rice plants (25 days old almost 20 cm high) as a food  
722 source for eleven days. The number of eggs and nymphs in plants were counted by a



723 microscope.

724 For *Drosophila* egg-laying assay, we adopted our previous method [81]. Briefly,  
725 insecticide-treated virgin females were paired with untreated males for three days and  
726 then the mated females transferred into the *Drosophila* ovipositing apparatus. The  
727 number of eggs were counted after 16 hours.

### 728 **Fitness analysis**

729 The fitness of EB-treated BPH were analyzed using methods reported previously  
730 [10]. We selected two groups, ( $\text{♂ck} \times \text{♀ck}$ ) and ( $\text{♂ck} \times \text{♀t}$ ), to study the effects of the LC<sub>50</sub>  
731 concentration of EB on BPH fitness. In the case of systemic exposure, 4<sup>th</sup> instar  
732 nymphs of BPH were treated with the LC<sub>50</sub> of EB for 4 days and then transferred to  
733 tubes containing untreated rice plants for individual rearing. The rice plants were  
734 replaced every three days with untreated plants. The emergence ratio, female ratio,  
735 preoviposition period, female longevity, brachypterism female ratio and female weight  
736 were calculated.

### 737 **Examination of ovary development**

738 Adult females from  $\text{♂ck} \times \text{♀ck}$  control and  $\text{♂ck} \times \text{♀t}$  group on 1, 3, 5, 7 DAE were  
739 dissected for observe the ovary development. The detained eggs in ovary were  
740 photographed and recorded. Each group has at least fifteen replicates.

741 To examination whether EB treated impairs egg maturation, we dissected  
742 untreated or EB-treated ovaries and fixed them in 4% paraformaldehyde (PFA) in  
743 phosphate buffered saline (PBS) for 30 min at room temperature. After four washes of

744 10 min (4 × 10 min) in PAT3 (PBS with 0.5% Triton X-100 and 0.5% bovine serum  
745 albumin), the ovaries were then incubated with DAPI (4',6-diamidino-2-phenylindole,  
746 100 nM) and Actin-stain 670 Fluorescent Phalloidin (200 nM). Imaging was performed  
747 using Zeiss LSM980 confocal laser microscope.

#### 748 **Measurements of glycogen, triglyceride, total protein content, cholesterol and** 749 **four sugars**

750 The content of glycogen, triglyceride, cholesterol and total protein was  
751 determined by spectrophotometry at 620 nm, 510 nm, 510 nm and 562 nm  
752 respectively using the glycogen assay kit (A043-1-1), triglyceride reagent kit (A110-1-  
753 1), cholesterol assay kit (A111-1-1) and total protein assay kit (A045-2-2) obtained  
754 from Nanjing Jiancheng Bioengineering Institute following to the manufacturer's  
755 instructions. The determined results were normalized to the protein content in the  
756 sample, which was determined using BCA Protein Assay Reagent Kit (Thermo  
757 Scientific, Waltham, USA). Each sample contained tissue extracts from five adult  
758 female BPH, with three biological replicates per sample.

759 To assess the content of four sugars (sucrose, glucose, fructose and trehalose)  
760 in the extract of BPH tissue, the same extraction method was used as above. Sugar  
761 content was quantified using the colorimetric method by scanning at 290 nm, 505  
762 nm, 285 nm and 620 nm respectively using the sucrose reagent kit (A099-1-1),  
763 glucose reagent kit (F006-1-1), fructose reagent kit (A085-1-1) and trehalose reagent  
764 kit (A150-1-1) obtained from Nanjing Jiancheng Bioengineering Institute based on the  
765 manufacturer's instructions. Each sample contained tissue extracts from five adult

766 female *N. lugens*, with three biological replicates per sample.

#### 767 **Determination of Juvenile hormone III and ecdysone titers of BPH by ELISA**

768 The titer of Juvenile hormone III in BPH was measured using the Juvenile  
769 hormone ELISA Kit (Lot Number: HLE92086, Shanghai HaLing Biotechnology Co., Ltd.,  
770 Shanghai, China) which employs the dual-antibody sandwich ELISA method. The titer  
771 of ecdysone in BPH were measured using the ecdysone ELISA Kit (Lot Number:  
772 ZK14705, Shanghai ZhenKe Biotechnology Co., Ltd., Shanghai, China). At least three  
773 biological replicates were employed for each treatment.

#### 774 **Determination of Juvenile hormone III titer in BPH using HPLC-MS/MS**

775 The whole bodies of 5 individuals BPH were mixed with 1 ml of n-hexane, followed  
776 by centrifugation at 10,000×g for 10 min, the upper hexane layer was then dried with  
777 nitrogen, dissolved in methanol and sonicated for 10 min, after centrifugation at  
778 10000×g for 10 min, the supernatant was collected through the organic filter membrane  
779 of 0.22 μm into 2 ml vials for JH III determination. JH III standard sample (J912305-  
780 10 mg) purchased from (Shanghai McLean Biochemical Technology Co. Ltd),  
781 dissolved in methyl alcohol as stock solution 10,000 mg/L was diluted in a series of six  
782 concentration gradients to serve as a reference. Liquid chromatography-tandem mass  
783 spectrometry (LC-MS/MS) was then carried out using UPLC Xevo TQ-S Micro (Waters  
784 technology), quantitative method according to the external standard, the  
785 chromatographic column was EC-C18 (4.6 mm×150 mm, 2.7 μm), column temperature  
786 was 30°C, injection volume was 20 μl, elution flow rate was 0.3 ml/min, and the mobile

787 phase was acetonitrile:formic acid water (90:10), detection wavelength was 218 nm,  
788 the peak height was used for quantification.

### 789 **Cloning, sequence and phylogenetic analysis**

790 The NCBI database and BLAST program were used to carry out sequence  
791 alignment and analysis. Open Reading Frames (ORFs) were predicted with EditSeq.  
792 Primers were designed using the primer design tool in NCBI. Total RNA Extraction was  
793 extracted from 30 adults BPH using TRIzol reagent (Invitrogen, Carlsbad, CA, USA)  
794 according to the manufacturer's instructions. cDNA was synthesized using the Biotech  
795 M-MLV reverse transcription kit. Full-length gene sequences were amplified by PCR  
796 using cDNA as template and Rapid Taq Master Mix (Vazyme Biotech, Cat# P222-02).  
797 The PCR product was purified on a 1% agarose gel, cloned into pClone007 Simple  
798 Vector Kit (Tsingke Biotech, Cat# TSV-007S), and then sequenced using the 3730 XL  
799 DNA analyzer (Applied Biosystems, Carlsbad, CA, USA). [Table S2](#) contains a list of  
800 the primers used in this study.

801 The exon and intron architectures of AT, AstA, AstB, AstCC and AstACCC were  
802 predicted based on the alignments of putative ORFs against their corresponding  
803 genomic sequences. Sequence similarity/annotations and orthologous gene searches  
804 were performed using BLAST programs available in NCBI. Multiple alignments of the  
805 complete amino acid sequences were performed with Clustal Omega  
806 (<http://www.ebi.ac.uk/Tools/msa/clustalo>). Phylogeny was conducted using the  
807 maximum likelihood technique to create phylogenetic trees and these were

808 bootstrapped with 1000 replications were used using the MEGA 6 software [82].

## 809 RNA interference

810 Double-stranded RNA (dsRNA) of *gfp* (green fluorescent protein), *JHAMT*  
811 (juvenile hormone acid O-methyltransferase), *Met* (methoprene-tolerant), *Kr-h1*  
812 (krüppel homolog 1), *AstAR* (allatostatin-A receptor) and *GluCl* (glutamate-gated  
813 chloride channel) was prepared using Ambion's MEGAscript T7 kit instructions  
814 following the manufacturer's instructions. The primer sequences for double-stranded  
815 RNA synthesis are listed in Table S2. Newly emerged females were injected with 40  
816 nl (5,000 ng/μl) of double-stranded RNA of *gfp* (*dsgfp*) or double-stranded RNA of the  
817 target genes in the conjunctive part between prothorax and mesothorax of insects. In  
818 the RNAi experiments, BPH were then treated with the LC<sub>50</sub> of EB 24h after dsRNA  
819 injection and the whole body sampled for qRT-PCR analysis.

## 820 Quantitative RT-PCR

821 Fourth instar nymphs of BPH were treated with EB after which total RNA was  
822 extracted from 5<sup>th</sup> instar nymphs and 1-7 day post-eclosion females of *N. lugens* using  
823 the methods detailed above. The HiScript® II RT SuperMix for qPCR (+gDNA wiper)  
824 kit from Vazyme, Nanjing, China, was used to create first-strand cDNA. Primer3  
825 (<http://bioinfo.ut.ee/primer3/>) was used to design real-time quantitative PCR (qPCR)  
826 primers listed in Table S2. mRNA levels of candidate genes were detected by qPCR  
827 using the UltraSYBR Mixture (with ROX) Kit (CW BIO, Beijing, China). Each reaction  
828 contained 2 μL of cDNA template (500 ng), 1 μL each forward and reverse qPCR primer

829 (10  $\mu$ M), 10  $\mu$ L of UltraSYBR mixture buffer, and 6  $\mu$ L of RNase-free water. Q-PCR  
830 was run on an ABI 7500 Real-Time PCR System (Applied Biosystems, Foster City, CA)  
831 under the following conditions: 5 min at 95°C, followed by 40 cycles of 95°C for 10 s  
832 and 60°C for 30 s. Three independent biological replicates and four technical replicates  
833 were used in each qPCR experiment. The housekeeping genes 18S ribosomal RNA  
834 of BPH were selected to normalize the expression of candidate genes. The  $2^{-\Delta\Delta C_t}$   
835 method (Ct represents the cycle threshold) was used to measure relative expression  
836 levels [83]. Three biological replicates were used for statistical comparison between  
837 samples. Table S2 contains a list of the primers used in this study.

### 838 **Statistics**

839 PoloPlus v2.0 (LeOra Software 2008) was used to calculate the lethal  
840 concentration (LC<sub>50</sub>) and 95% fiducial limits (95% F.L.). GraphPad Prism 8.0 software  
841 (GraphPad Software Inc., San Diego, USA) was used to generate graphs and perform  
842 statistical analysis of data. Data presented in this study were first verified for normal  
843 distribution using the D'Agostino–Pearson normality test. One-way analysis of  
844 variance (ANOVA) with Duncan's multiple range test was used to test differences  
845 among multiple groups of normally distributed groups of data. Student's t test was used  
846 to test the differences between two groups. If not normally distributed, Mann–Whitney  
847 test was used for pairwise comparisons, and Kruskal–Wallis test was used for  
848 comparisons among multiple groups, followed by Dunn's multiple comparisons. All  
849 data are presented as mean  $\pm$  s.e.m. The sample sizes and statistical tests used for  
850 each experiment are stated in the figures or figure legends.

**Table S2** Sequences of oligonucleotide primers used in this study.

| Primers                        | Primer sequences (5' - 3')       |
|--------------------------------|----------------------------------|
| <b>For cDNA cloning</b>        |                                  |
| <b>Allatotropin:</b>           |                                  |
| NIAT-F                         | TACGCGGCCAAACACACTTA             |
| NIAT-R                         | AGGGAAAGAGGGCGAAATTCA            |
| <b>Allatostatins:</b>          |                                  |
| NIastA-F                       | TCGGCCGTCACAAGTCAAG              |
| NIastA-R                       | CCGAACCCGTACTTCATGCT             |
| NIastB-F                       | ACCGGGCTCACAGGAATTTT             |
| NIastB-R                       | TGTAGGCGCAGATCTTGAGG             |
| NIastCC-F                      | AACACAGCTCTACGAGGCAC             |
| NIastCC-R                      | CCAAGCAGGTGACTGCCATA             |
| NIastCCC-F                     | TTTGTGTGTGCTTGCAGGTG             |
| NIastCCC-R                     | GGATAGAAACGGTAGATTTGGTAGA        |
| <b>Allatostatins receptor:</b> |                                  |
| NIA16-F                        | CCTCATTGTGGAACCACCGA             |
| NIA16-R                        | CGCAGCTGTAAGGTGGAAGA             |
| NIA2-F                         | GAACGTAATGGGAGTCGGCA             |
| NIA2-R                         | GTTTTTGTGAGCGCCGACTT             |
| NIA10-F                        | ATGCAAACACGGCCAGCCT              |
| NIA10-R                        | TTAATCGTCTCTGCTCAACTCCAAAGGAAGGT |
| NIA1-F                         | CGACCAGACCACTCTACTGC             |
| NIA1-R                         | ACGTGGACCTCACTATACCAAAAA         |
| <b>For Quantitative RT-PCR</b> |                                  |
| Q-NI18S-F                      | CGCTACTACCGATTGAA                |
| Q-NI18S-R                      | GGAAACCTTGTTACGACTT              |
| Q-vitellogenin-F               | GTGGCTCGTTCAAGTTATGG             |
| Q-vitellogenin-R               | GCAATCTCTGGGTGCTGTTG             |
| Q-Vitellogenin receptor-F      | AGGCAGCCACACAGATAACCGC           |
| Q-Vitellogenin receptor-R      | AGCCGCTCGCTCCAGAACATT            |
| Q-JHE-F                        | GAGCCTCACATCCACAGC               |
| Q-JHE-R                        | AATGGGAGCCCTACGC                 |
| Q-NIMet-F                      | GGTGGTAAACGGATTGGAAA             |
| Q-NIMet-R                      | CATCGTCAGCCAACCTCGATA            |
| Q-NIFAMet-F                    | GCAAAGTCAGCAATCCGCAAGAAC         |
| Q-NIFAMet-R                    | ACACCGTAGTGGGTGACAACGAATG        |
| Q-JHAMT-F                      | GAACCTGCAGGCCAAACACA             |
| Q-JHAMT-R                      | ACCACTCGGTTGGGCTGAAT             |
| Q-NIKr-h1-F                    | TGATGAGGCACACGATGACT             |
| Q-NIKr-h1-R                    | ATGGAAGGCCACATCAAGAG             |
| Q-NIAT-F                       | CACGATACGTGGCTTCAAGA             |
| Q-NIAT-R                       | ACGATCACTTTGCGCCAATTC            |
| Q-NIastA-F                     | AGGACTTACTGGGCGAGGAT             |

|              |                      |
|--------------|----------------------|
| Q-NIAstA-R   | GGTGTCTCGTTTCCTGGTGT |
| Q-NIAstB-F   | AGCGAGCTAGACGAGGACAA |
| Q-NIAstB-R   | TCGTCTCTGCTCAACTCCAA |
| Q-NIAstCC-F  | CTGCTCCCAGTGAAAAGGAG |
| Q-NIAstCC-R  | GCTTCCAGTAACTGCGCTTC |
| Q-NIAstCCC-F | TGTGCTTGCAGGTGGTAGTC |
| Q-NIAstCCC-R | AGAAGCATGTGACTGCGTTG |
| Q-NIA2-F     | TCCTGGTGCTGAAGAGTGTG |
| Q-NIA2-R     | CTTTTCGGGCCCATTAATTT |
| Q-NLA1-F     | ATATCGGCACCGAAGATGAG |
| Q-NLA1-R     | GTCTGACCCGACAGGTTCTC |
| Q-NLA10-F    | ACTGGGTGTCGACCAATCTC |
| Q-NLA10-R    | TCGGTAGCGAGGAAGACAGT |
| Q-NLA16-F    | TACCGTTCTGTGGGATGTCA |
| Q-NLA16-R    | CCGGGATATCAAAGACGAGA |
| Q-NIGluCl-F  | CACTGACTGAGGCCAACAGA |
| Q-NIGluCl-R  | GCTGGCCATTCTTAGTGAGC |

**For double-stranded RNA synthesis**

|             |                                              |
|-------------|----------------------------------------------|
| T7-EGFP-F   | TAATACGACTCACTATAGGGCGTAAACGGCCACAAGTTCA     |
| T7-EGFP-R   | TAATACGACTCACTATAGGGGACTGGGTGCTCAGGTAGTG     |
| T7-Kr-h1-F  | TAATACGACTCACTATAGGGCGCCAGTGAAAGTGAGACCT     |
| T7-Kr-h1-R  | TAATACGACTCACTATAGGGGAGACCGCAAGTGGTTCTGA     |
| T7-Met-F    | TAATACGACTCACTATAGGGCCACCAACCAGCAGATGAACCTGA |
| T7-Met-R    | TAATACGACTCACTATAGGGCCACGCAAAGCCTCGTACTCTTGG |
| T7-JHAMT-F  | TAATACGACTCACTATAGGGCTCCAGGCCATTGTCCCTCA     |
| T7-JHAMT-R  | TAATACGACTCACTATAGGGTTGGCCTGCAGGTTCTTTGG     |
| T7-AstA-R-F | TAATACGACTCACTATAGGGTACTGCCGTTCTGGCCTTTT     |
| T7-AstA-R-R | TAATACGACTCACTATAGGGGTGATCTGGAAGAGCGGCTT     |
| T7-Glucl-F  | TAATACGACTCACTATAGGGACACATCACCTGCTCACCTG     |
| T7-Glucl-R  | TAATACGACTCACTATAGGGGTGTGTTTGCCTGCTGTCTG     |



853 **Acknowledgments**

854 This research was funded by the National Key R&D Program of China

855 (2022YFD1700200) and National Natural Science Foundation of China (32022011).

856

## 857 References

- 858 1. Janssen A, van Rijn PCJ. Pesticides do not significantly reduce arthropod pest densities in the presence of natural enemies. *Ecol Lett.*  
859 2021;24(9):2010-24. doi: <https://doi.org/10.1111/ele.13819>.
- 860 2. Wu SF, Zeng B, Zheng C, Mu XC, Zhang Y, Hu J, et al. The evolution of insecticide resistance in the brown planthopper (*Nilaparvata*  
861 *lugens* Stål) of China in the period 2012–2016. *Sci Rep.* 2018;8(1):4586. doi: 10.1038/s41598-018-22906-5.
- 862 3. Wu J, Ge L, Liu F, Song Q, Stanley D. Pesticide-induced planthopper population resurgence in rice cropping systems. *Annu Rev Entomol.*  
863 2020;65(1):409-29. doi: 10.1146/annurev-ento-011019-025215. PubMed PMID: 31610135.
- 864 4. Guedes RNC, Smagghe G, Stark JD, Desneux N. Pesticide-induced stress in arthropod pests for optimized integrated pest management  
865 programs. *Annu Rev Entomol.* 2016;61(1):43-62. doi: 10.1146/annurev-ento-010715-023646.
- 866 5. Hardin MR, Benrey B, Coll M, Lamp WO, Roderick GK, Barbosa P. Arthropod pest resurgence: an overview of potential mechanisms.  
867 *Crop Protection.* 1995;14(1):3-18. doi: [https://doi.org/10.1016/0261-2194\(95\)91106-P](https://doi.org/10.1016/0261-2194(95)91106-P).
- 868 6. Ge L-Q, Wu J-C, Zhao K-F, Chen Y, Yang G-Q. Induction of Nlvg and suppression of Nljhe gene expression in *Nilaparvata lugens* (Stål)  
869 (Hemiptera: Delphacidae) adult females and males exposed to two insecticides. *Pestic Biochem Physiol* 2010;98(2):269-78. doi:  
870 <https://doi.org/10.1016/j.pestbp.2010.06.018>.
- 871 7. Zhang Y-X, Zhu Z-F, Lu X-L, Li X, Ge L-Q, Fang J-C, et al. Effects of two pesticides, TZP and JGM, on reproduction of three planthopper  
872 species, *Nilaparvata lugens* Stål, *Sogatella furcifera* Horvath, and *Laodelphax striatella* Fallén. *Pestic Biochem Physiol* 2014;115:53-7. doi:  
873 <https://doi.org/10.1016/j.pestbp.2014.07.012>.
- 874 8. Wu Y, Ding J, Xu B, You L, Ge L, Yang G, et al. Two fungicides alter reproduction of the small brown planthopper *Laodelphax striatellus*  
875 by influencing gene and protein expression. *J Proteome Res.* 2018;17(3):978-86. doi: 10.1021/acs.jproteome.7b00612.
- 876 9. Sōgawa K. The rice brown planthopper: Feeding physiology and host plant interactions. *Annu Rev Entomol.* 1982;27(1):49-73. doi:  
877 10.1146/annurev.en.27.010182.000405.
- 878 10. Zeng B, Chen F-R, Liu Y-T, Di G, Zhang Y-J, Feng Z-R, et al. A chitin synthase mutation confers widespread resistance to buprofezin, a  
879 chitin synthesis inhibitor, in the brown planthopper, *Nilaparvata lugens*. *J Pest Sci.* 2023;96:819–32. doi: 10.1007/s10340-022-01538-9.
- 880 11. Ishaaya I, Kontsedalov S, Horowitz AR. Emamectin, a novel insecticide for controlling field crop pests. *Pest Manag Sci.*  
881 2002;58(11):1091-5. doi: <https://doi.org/10.1002/ps.535>.
- 882 12. Chintalapati P, Katti G, Puskur RR, Nagella Venkata K. Neonicotinoid-induced resurgence of rice leafhopper, *Cnaphalocrocis medinalis*  
883 (Guénee). *Pest Manag Sci.* 2016;72(1):155-61. doi: 10.1002/ps.3983.
- 884 13. Zhang Y, Ruan Y, Gong C, Zhang S, Zhang J, He Y, et al. Reproductive outbreaks of *Sogatella furcifera* mediated by overexpression of the  
885 nuclear receptor USP under pressure from triflumezopyrim. *Int J Mol Sci.* 2022;23(22):13769. PubMed PMID: doi:10.3390/ijms232213769.
- 886 14. Ge L-Q, Huang L-J, Yang G-Q, Song Q-S, Stanley D, Gurr GM, et al. Molecular basis for insecticide-enhanced thermotolerance in the  
887 brown planthopper *Nilaparvata lugens* Stål (Hemiptera:Delphacidae). *Mol Ecol.* 2013;22(22):5624-34. doi: 10.1111/mec.12502.
- 888 15. Wang G, Vega-Rodríguez J, Diabate A, Liu J, Cui C, Nignan C, et al. Clock genes and environmental cues coordinate *Anopheles* pheromone  
889 synthesis, swarming, and mating. *Science.* 2021;371(6527):411. doi: 10.1126/science.abd4359.
- 890 16. Meiselman MR, Alpert MH, Cui X, Shea J, Gregg I, Gallio M, et al. Recovery from cold-induced reproductive dormancy is regulated by  
891 temperature-dependent AstC signaling. *Current Biol.* 2022;32(6):1362-75.e8. doi: <https://doi.org/10.1016/j.cub.2022.01.061>.
- 892 17. Roy S, Saha TT, Johnson L, Zhao B, Ha J, White KP, et al. Regulation of gene expression patterns in mosquito reproduction. *PLoS Genet.*  
893 2015;11(8):e1005450. doi: 10.1371/journal.pgen.1005450.
- 894 18. Smykal V, Raikhel AS. Nutritional control of insect reproduction. *Curr Opin Insect Sci.* 2015;11:31-8. doi:  
895 <https://doi.org/10.1016/j.cois.2015.08.003>.
- 896 19. Santos CG, Humann FC, Hartfelder K. Juvenile hormone signaling in insect oogenesis. *Curr Opin Insect Sci.* 2019;31:43-8. doi:  
897 <https://doi.org/10.1016/j.cois.2018.07.010>.
- 898 20. Hun LV, Okamoto N, Imura E, Maxson R, Bittar R, Yamanaka N. Essential functions of mosquito ecdysone importers in development  
899 and reproduction. *Proc Natl Acad Sci U S A.* 2022;119(25):e2202932119. doi: doi:10.1073/pnas.2202932119.

- 900 21. Ling L, Raikhel AS. Serotonin signaling regulates insulin-like peptides for growth, reproduction, and metabolism in the disease vector  
901 *Aedes aegypti*. Proc Natl Acad Sci U S A. 2018;115(42):E9822. doi: 10.1073/pnas.1808243115.
- 902 22. Lu K, Chen X, Liu W-T, Zhou Q. TOR pathway-mediated juvenile hormone synthesis regulates nutrient-dependent female reproduction  
903 in *Nilaparvata lugens* (Stål). Int J Mol Sci. 2016;17(4):438. PubMed PMID: doi:10.3390/ijms17040438.
- 904 23. Du B, Ding D, Ma C, Guo W, Kang L. Locust density shapes energy metabolism and oxidative stress resulting in divergence of flight  
905 traits. Proc Natl Acad Sci U S A. 2022;119(1):e2115753118. doi: 10.1073/pnas.2115753118.
- 906 24. Ahmed TH, Saunders TR, Mullins D, Rahman MZ, Zhu J. Molecular action of pyriproxyfen: Role of the Methoprene-tolerant protein in  
907 the pyriproxyfen-induced sterilization of adult female mosquitoes. PLoS Negl Trop Dis. 2020;14(8):e0008669. doi:  
908 10.1371/journal.pntd.0008669.
- 909 25. Luo W, Liu S, Zhang W, Yang L, Huang J, Zhou S, et al. Juvenile hormone signaling promotes ovulation and maintains egg shape by  
910 inducing expression of extracellular matrix genes. Proc Natl Acad Sci U S A. 2021;118(39):e2104461118. doi: 10.1073/pnas.2104461118.
- 911 26. Yao R, Zhao DD, Zhang S, Zhou LQ, Wang X, Gao CF, et al. Monitoring and mechanisms of insecticide resistance in *Chilo suppressalis*  
912 (Lepidoptera: Crambidae), with special reference to diamides. Pest Manag Sci. 2017;73(6):1169-78. doi: 10.1002/ps.4439.
- 913 27. Jing Y-P, Wen X, Li L, Zhang S, Zhang C, Zhou S. The vitellogenin receptor functionality of the migratory locust depends on its  
914 phosphorylation by juvenile hormone. Proc Natl Acad Sci U S A. 2021;118(37):e2106908118. doi: 10.1073/pnas.2106908118.
- 915 28. Ling L, Raikhel AS. Cross-talk of insulin-like peptides, juvenile hormone, and 20-hydroxyecdysone in regulation of metabolism in the  
916 mosquito *Aedes aegypti*. Proc Natl Acad Sci U S A. 2021;118(6):e2023470118. doi: 10.1073/pnas.2023470118.
- 917 29. Zheng H, Wang N, Yun J, Xu H, Yang J, Zhou S. Juvenile hormone promotes paracellular transport of yolk proteins via remodeling zonula  
918 adherens at tricellular junctions in the follicular epithelium. PLoS Genet. 2022;18(6):e1010292. doi: 10.1371/journal.pgen.1010292.
- 919 30. Guo W, Song J, Yang P, Chen X, Chen D, Ren D, et al. Juvenile hormone suppresses aggregation behavior through influencing antennal  
920 gene expression in locusts. PLoS Genet. 2020;16(4):e1008762. doi: 10.1371/journal.pgen.1008762.
- 921 31. BOWNES M, REMBOLD H. The titre of juvenile hormone during the pupal and adult stages of the life cycle of *Drosophila melanogaster*.  
922 Eur J Biochem. 1987;164(3):709-12. doi: <https://doi.org/10.1111/j.1432-1033.1987.tb11184.x>.
- 923 32. Gospocic J, Glastad KM, Sheng L, Shields EJ, Berger SL, Bonasio R. Kr-h1 maintains distinct caste-specific neurotranscriptomes in  
924 response to socially regulated hormones. Cell. 2021;184(23):5807-23.e14. doi: <https://doi.org/10.1016/j.cell.2021.10.006>.
- 925 33. Nouzova M, Rivera-Pérez C, Noriega FG. Omics approaches to study juvenile hormone synthesis. Curr Opin Insect Sci. 2018;29:49-55.  
926 doi: <https://doi.org/10.1016/j.cois.2018.05.013>.
- 927 34. Liu S, Zhang C, Yang B, Gu J, Liu Z. Cloning and characterization of a putative farnesoic acid O -methyltransferase gene from the brown  
928 planthopper, *Nilaparvata lugens*. J Insect Sci. 2010;10(1). doi: 10.1673/031.010.10301.
- 929 35. Shinoda T, Itoyama K. Juvenile hormone acid methyltransferase: A key regulatory enzyme for insect metamorphosis. Proc Natl Acad  
930 Sci U S A. 2003;100(21):11986. doi: 10.1073/pnas.2134232100.
- 931 36. Zhu G-H, Jiao Y, Chereddy SCRR, Noh MY, Palli SR. Knockout of juvenile hormone receptor, Methoprene-tolerant, induces black larval  
932 phenotype in the yellow fever mosquito, *Aedes aegypti*. Proc Natl Acad Sci U S A. 2019;201905729. doi: 10.1073/pnas.1905729116.
- 933 37. Riddiford LM. Rhodnius, golden oil, and met: A history of juvenile hormone research. Front Cell Dev Biol. 2020;8(679). doi:  
934 10.3389/fcell.2020.00679.
- 935 38. Jindra M, Palli SR, Riddiford LM. The juvenile hormone signaling pathway in insect development. Annu Rev Entomol. 2013;58(1):181-  
936 204. doi: 10.1146/annurev-ento-120811-153700. PubMed PMID: 22994547.
- 937 39. Zhang C, Kim AJ, Rivera-Perez C, Noriega FG, Kim Y-J. The insect somatostatin pathway gates vitellogenesis progression during  
938 reproductive maturation and the post-mating response. Nat Commun. 2022;13(1):969. doi: 10.1038/s41467-022-28592-2.
- 939 40. Shen Y, Chen Y-Z, Lou Y-H, Zhang C-X. Vitellogenin and vitellogenin-like genes in the brown planthopper. Front Physiol. 2019;10. doi:  
940 10.3389/fphys.2019.01181.
- 941 41. Kamita SG, Hinton AC, Wheelock CE, Wogulis MD, Wilson DK, Wolf NM, et al. Juvenile hormone (JH) esterase: why are you so JH specific?  
942 Insect Biochem Mol Biol. 2003;33(12):1261-73. doi: <https://doi.org/10.1016/j.ibmb.2003.08.004>.
- 943 42. Kataoka H, Toschi A, Li JP, Carney RL, Schooley DA, Kramer SJ. Identification of an allatotropin from adult *Manduca Sexta*. Science.

- 944 1989;243(4897):1481-3. doi: doi:10.1126/science.243.4897.1481.
- 945 43. Woodhead AP, Stay B, Seidel SL, Khan MA, Tobe SS. Primary structure of four allatostatins: neuropeptide inhibitors of juvenile hormone  
946 synthesis. Proc Natl Acad Sci U S A. 1989;86(15):5997-6001. doi: doi:10.1073/pnas.86.15.5997.
- 947 44. Kramer SJ, Toschi A, Miller CA, Kataoka H, Quistad GB, Li JP, et al. Identification of an allatostatin from the tobacco hornworm *Manduca*  
948 *sexta*. Proc Natl Acad Sci U S A. 1991;88(21):9458-62. doi: doi:10.1073/pnas.88.21.9458.
- 949 45. Lorenz MW, Kellner R, Hoffmann KH. A family of neuropeptides that inhibit juvenile hormone biosynthesis in the cricket, *Gryllus*  
950 *bimaculatus*. J Biol Chem. 1995;270(36):21103-8. doi: 10.1074/jbc.270.36.21103.
- 951 46. Bellés X, Graham LA, Bendenab WG, Ding Q, Edwards JP, Weaver RJ, et al. The molecular evolution of the allatostatin precursor in  
952 cockroaches. Peptides. 1999;20(1):11-22. doi: [https://doi.org/10.1016/S0196-9781\(98\)00155-7](https://doi.org/10.1016/S0196-9781(98)00155-7).
- 953 47. Stay B, Tobe SS. The role of allatostatins in juvenile hormone synthesis in insects and crustaceans. Annu Rev Entomol. 2007;52(1):277-  
954 99. doi: 10.1146/annurev.ento.51.110104.151050. PubMed PMID: 16968202.
- 955 48. Wegener C, Chen J. Allatostatin A signalling: Progress and new challenges from a paradigmatic pleiotropic invertebrate neuropeptide  
956 family. Front Physiol. 2022;13. doi: 10.3389/fphys.2022.920529.
- 957 49. Verlinden H, Gijbels M, Lismont E, Lenaerts C, Vanden Broeck J, Marchal E. The pleiotropic allatoregulatory neuropeptides and their  
958 receptors: A mini-review. J Insect Physiol. 2015;80:2-14. doi: <https://doi.org/10.1016/j.jinsphys.2015.04.004>.
- 959 50. Yin G-L, Yang J-S, Cao J-X, Yang W-J. Molecular cloning and characterization of FGLamide allatostatin gene from the prawn,  
960 *Macrobrachium rosenbergii*. Peptides. 2006;27(6):1241-50. doi: <https://doi.org/10.1016/j.peptides.2005.11.015>.
- 961 51. Wang C, Chin-Sang I, Bendena WG. The FGLamide-Allatostatins influence foraging behavior in *Drosophila melanogaster*. PLOS ONE.  
962 2012;7(4):e36059. doi: 10.1371/journal.pone.0036059.
- 963 52. Veenstra JA. Allatostatin C and its paralog allatostatin double C: The arthropod somatostatins. Insect Biochem Mol Biol.  
964 2009;39(3):161-70. doi: <https://doi.org/10.1016/j.ibmb.2008.10.014>.
- 965 53. Veenstra JA. Allatostatins C, double C and triple C, the result of a local gene triplication in an ancestral arthropod. Gen Comp Endocrinol.  
966 2016;230-231:153-7. doi: <https://doi.org/10.1016/j.ygcen.2016.04.013>.
- 967 54. Nässel DR. Neuropeptides in the nervous system of *Drosophila* and other insects: multiple roles as neuromodulators and  
968 neurohormones. Prog Neurobiol. 2002;68(1):1-84. doi: [https://doi.org/10.1016/S0301-0082\(02\)00057-6](https://doi.org/10.1016/S0301-0082(02)00057-6).
- 969 55. Tanaka Y, Suetsugu Y, Yamamoto K, Noda H, Shinoda T. Transcriptome analysis of neuropeptides and G-protein coupled receptors  
970 (GPCRs) for neuropeptides in the brown planthopper *Nilaparvata lugens*. Peptides. 2014;53:125-33. doi:  
971 <https://doi.org/10.1016/j.peptides.2013.07.027>.
- 972 56. Audsley N, Vandersmissen HP, Weaver R, Dani P, Matthews J, Down R, et al. Characterisation and tissue distribution of the PISCF  
973 allatostatin receptor in the red flour beetle, *Tribolium castaneum*. Insect Biochem Mol Biol. 2013;43(1):65-74. doi:  
974 <https://doi.org/10.1016/j.ibmb.2012.09.007>.
- 975 57. Sparks TC, Storer N, Porter A, Slater R, Nauen R. Insecticide resistance management and industry: the origins and evolution of the  
976 Insecticide Resistance Action Committee (IRAC) and the mode of action classification scheme. Pest Manag Sci. 2021;77(6):2609-19. doi:  
977 <https://doi.org/10.1002/ps.6254>.
- 978 58. Sparks TC, Crossthwaite AJ, Nauen R, Banba S, Cordova D, Earley F, et al. Insecticides, biologics and nematicides: Updates to IRAC's  
979 mode of action classification - a tool for resistance management. Pestic Biochem Physiol 2020;167:104587. doi:  
980 <https://doi.org/10.1016/j.pestbp.2020.104587>.
- 981 59. Wu SF, Mu XC, Dong YX, Wang LX, Wei Q, Gao CF. Expression pattern and pharmacological characterisation of two novel alternative  
982 splice variants of the glutamate-gated chloride channel in the small brown planthopper *Laodelphax striatellus*. Pest Manag Sci.  
983 2017;73(3):590-7. doi: 10.1002/ps.4340.
- 984 60. Wang L-P, Shen J, Ge L-Q, Wu J-C, Yang G-Q, Jahn GC. Insecticide-induced increase in the protein content of male accessory glands and  
985 its effect on the fecundity of females in the brown planthopper *Nilaparvata lugens* Stål (Hemiptera: Delphacidae). Crop Protection.  
986 2010;29(11):1280-5. doi: <https://doi.org/10.1016/j.cropro.2010.07.009>.
- 987 61. Ge L-Q, Cheng Y, Wu J-C, Jahn GC. Proteomic analysis of insecticide triazophos-induced mating-responsive proteins of *Nilaparvata*

- 988 *lugens* Stål (Hemiptera: Delphacidae). J Proteome Res. 2011;10(10):4597-612. doi: 10.1021/pr200414g.
- 989 62. Zhao K-F, Shi Z-P, Wu J-C. Insecticide-induced enhancement of flight capacity of the brown planthopper *Nilaparvata lugens* Stål  
990 (Hemiptera: Delphacidae). Crop Protection. 2011;30(4):476-82. doi: <https://doi.org/10.1016/j.cropro.2010.11.026>.
- 991 63. Wan D-J, Chen J, Jiang L-B, Ge L-Q, Wu J-C. Effects of the insecticide triazophos on the ultrastructure of the flight muscle of the brown  
992 planthopper *Nilaparvata lugens* Stål (Hemiptera: Delphacidae). Crop Protection. 2013;43:54-9. doi:  
993 <https://doi.org/10.1016/j.cropro.2012.08.011>.
- 994 64. Cheng J, Huang L-J, Zhu Z-F, Jiang L-B, Ge L-Q, Wu J-C. Heat-dependent fecundity enhancement observed in *Nilaparvata lugens*  
995 (Hemiptera: Delphacidae) after treatment with triazophos. Environ Entomol. 2014;43(2):474-81. doi: 10.1603/en13249.
- 996 65. Yang H, Zhou C, Jin D-c, Gong M-f, Wang Z, Long G-y. Sublethal effects of abamectin on the development, fecundity, and wing morphs  
997 of the brown planthopper *Nilaparvata lugens*. J Asia Pac Entomol. 2019;22(4):1180-6. doi: <https://doi.org/10.1016/j.aspen.2019.10.012>.
- 998 66. Yin J-L, Xu H-W, Wu J-C, Hu J-H, Yang G-Q. Cultivar and insecticide applications affect the physiological development of the brown  
999 planthopper, *Nilaparvata lugens* (Stål) (Hemiptera: Delphacidae). Environ Entomol. 2014;37(1):206-12. doi: 10.1603/0046-  
1000 225x(2008)37[206:caiaat]2.0.co;2.
- 1001 67. Riddiford LM. Juvenile hormone action: A 2007 perspective. J Insect Physiol. 2008;54(6):895-901. doi:  
1002 <https://doi.org/10.1016/j.jinsphys.2008.01.014>.
- 1003 68. Xu B, You L-L, Wu Y, Ding J, Ge L-Q, Wu J-C. Transmission electron microscopy (TEM) observations of female oocytes from *Nilaparvata*  
1004 *lugens* (Hemiptera: Delphacidae): Antibiotic jinggangmycin (JGM)-induced stimulation of reproduction and associated changes in hormone  
1005 levels. J Econ Entomol. 2016;109(4):1677-82. doi: 10.1093/jee/tow085.
- 1006 69. Shah S, Zhang S-S, Elgizawy KK, Yan W-H, Tang N, Wu G, et al. Diallyl trisulfide reduced the reproductive capacity of male *Sitotroga*  
1007 *cerealella* via the regulation of juvenile and ecdysone hormones. Ecotoxicol Environ Saf. 2022;248:114304. doi:  
1008 <https://doi.org/10.1016/j.ecoenv.2022.114304>.
- 1009 70. Jin M-n, Xue J, Yao Y, Lin X-d. Molecular characterization and functional analysis of krüppel-homolog 1 (Kr-h1) in the brown  
1010 planthopper, *Nilaparvata lugens* (Stål). J Integr Agric. 2014;13(9):1972-81. doi: [https://doi.org/10.1016/S2095-3119\(13\)60654-1](https://doi.org/10.1016/S2095-3119(13)60654-1).
- 1011 71. Lin X, Yao Y, Wang B. Methoprene-tolerant (Met) and Krüppel-homologue 1 (Kr-h1) are required for ovariole development and egg  
1012 maturation in the brown plant hopper. Sci Rep. 2015;5(1):18064. doi: 10.1038/srep18064.
- 1013 72. Zhang C, Daubnerova I, Jang Y-H, Kondo S, Žitňan D, Kim Y-J. The neuropeptide allatostatin C from clock-associated DN1p neurons  
1014 generates the circadian rhythm for oogenesis. Proc Natl Acad Sci U S A. 2021;118(4):e2016878118. doi: 10.1073/pnas.2016878118.
- 1015 73. Stay B, Fairbairn S, Yu CG. Role of allatostatins in the regulation of juvenile hormone synthesis. Arch Insect Biochem Physiol.  
1016 1996;32(3-4):287-97. doi: [https://doi.org/10.1002/\(SICI\)1520-6327\(1996\)32:3/4<287::AID-ARCH3>3.0.CO;2-Q](https://doi.org/10.1002/(SICI)1520-6327(1996)32:3/4<287::AID-ARCH3>3.0.CO;2-Q).
- 1017 74. Yagi KJ, Kwok R, Chan KK, Setter RR, Myles TG, Tobe SS, et al. Phe-Gly-Leu-amide allatostatin in the termite *Reticulitermes flavipes*:  
1018 Content in brain and corpus allatum and effect on juvenile hormone synthesis. J Insect Physiol. 2005;51(4):357-65. doi:  
1019 <https://doi.org/10.1016/j.jinsphys.2004.12.006>.
- 1020 75. Hentze JL, Carlsson MA, Kondo S, Nässel DR, Rewitz KF. The neuropeptide allatostatin A regulates metabolism and feeding decisions  
1021 in *Drosophila*. Sci Rep. 2015;5(1):11680. doi: 10.1038/srep11680.
- 1022 76. Liu H-P, Lin S-C, Lin C-Y, Yeh S-R, Chiang A-S. Glutamate-gated chloride channels inhibit juvenile hormone biosynthesis in the cockroach,  
1023 *Diploptera punctata*. Insect Biochem Mol Biol. 2005;35(11):1260-8. doi: <http://dx.doi.org/10.1016/j.ibmb.2005.06.004>.
- 1024 77. Hasebe M, Shiga S. Clock gene-dependent glutamate dynamics in the bean bug brain regulate photoperiodic reproduction. PLOS Biol.  
1025 2022;20(9):e3001734. doi: 10.1371/journal.pbio.3001734.
- 1026 78. Chen B, Wen L, Zhao J, Liang H, Jiao X. Laboratory risk assessment of seven insecticides to the wolf spider *Pardosa pseudoannulata*. J  
1027 Plant Protect. 2017;44:1059-60.
- 1028 79. Sogawa K. Planthopper outbreaks in different paddy ecosystems in Asia: Man-made hopper plagues that threatened the green  
1029 revolution in rice. In: Heong KL, Cheng J, Escalada MM, editors. Rice Planthoppers: Ecology, Management, Socio Economics and Policy.  
1030 Dordrecht: Springer Netherlands; 2015. p. 33-63.
- 1031 80. Huang JM, Rao C, Wang S, He LF, Zhao SQ, Zhou LQ, et al. Multiple target-site mutations occurring in lepidopterans confer resistance

- 1032 to diamide insecticides. *Insect Biochem Mol Biol.* 2020;121:103367. doi: <https://doi.org/10.1016/j.ibmb.2020.103367>.
- 1033 81. Wu SF, Ja YL, Zhang YJ, Yang CH. Sweet neurons inhibit texture discrimination by signaling TMC-expressing mechanosensitive neurons
- 1034 in *Drosophila*. *eLife.* 2019;8:e46165. doi: [10.7554/eLife.46165](https://doi.org/10.7554/eLife.46165).
- 1035 82. Tamura K, Stecher G, Peterson D, Filipski A, Kumar S. MEGA6: Molecular evolutionary genetics analysis version 6.0. *Mol Biol Evol.*
- 1036 2013;30(12):2725-9. doi: [10.1093/molbev/mst197](https://doi.org/10.1093/molbev/mst197).
- 1037 83. Livak KJ, Schmittgen TD. Analysis of relative gene expression data using real-time quantitative PCR and the  $2^{-\Delta\Delta CT}$  method. *Methods.*
- 1038 2001;25(4):402-8. doi: [10.1006/meth.2001.1262](https://doi.org/10.1006/meth.2001.1262).
- 1039
- 1040
